# Proteasomal subunit depletions differentially affect germline integrity in *C. elegans*

1 Lourds Michelle Fernando<sup>†1,3</sup>, Cristina Quesada-Candela<sup>†2</sup>, Makaelah Murray<sup>1,4</sup>, Caroline Ugoaru<sup>1</sup>,  
2 Judith L. Yanowitz<sup>\*2,5</sup>, and Anna K. Allen<sup>\*1</sup>

## 3 **Affiliations:**

4 <sup>1</sup> Department of Biology, Howard University, Washington, DC, USA

5 <sup>2</sup> Magee-Womens Research Institute, Department of Obstetrics, Gynecology, and Reproductive  
6 Sciences, University of Pittsburgh School of Medicine, Pittsburgh, PA, USA

7 <sup>3</sup> Present affiliation: St. Jude Children's Research Hospital, Memphis, Tennessee

8 <sup>4</sup> Present affiliation: Genentech, South San Francisco, California

9 <sup>5</sup> Departments of Developmental Biology and Microbiology and Molecular Genetics, and the Hillman  
10 Cancer Center, University of Pittsburgh School of Medicine, Pittsburgh, PA

11 <sup>†</sup> These authors have contributed equally to this work and share first authorship.

12

## 13 **\* Correspondence:**

14 Anna K. Allen email: [anna.allen@howard.edu](mailto:anna.allen@howard.edu)

15 Judith L. Yanowitz email: [yanowitzjl@mwri.magee.edu](mailto:yanowitzjl@mwri.magee.edu)

16

## 17 **Running Title:**

18 19S RP subunit requirements in oogenesis

19

20 **Key words:** proteasome, *C. elegans*, germ line, 19S regulatory particle,

21

22

23

24

25 **Abstract**

26 The 26S proteasome is a multi-subunit protein complex that is canonically known for its ability to  
27 degrade proteins in cells and maintain protein homeostasis. Non-canonical or non-proteolytic roles of  
28 proteasomal subunits exist, but remain less well studied. We provide characterization of germline-  
29 specific functions of different 19S RP proteasome subunits in *C. elegans* using RNAi specifically  
30 from the L4 stage and through generation of endogenously tagged 19S RP lid subunit strains. We  
31 show functions for the 19S RP in regulation of proliferation and maintenance of integrity of mitotic  
32 zone nuclei, in polymerization of the synaptonemal complex (SC) onto meiotic chromosomes and in  
33 the timing of SC subunit redistribution to the short arm of the bivalent, and in turnover of XND-1  
34 proteins at late pachytene. Furthermore, we report that certain 19S RP subunits are required for  
35 proper germ line localization of WEE-1.3, a major meiotic kinase. Additionally, endogenous  
36 fluorescent labeling revealed that the two isoforms of the essential 19S RP proteasome subunit RPN-  
37 6.1 are expressed in a tissue-specific manner in the hermaphrodite. Also, we demonstrate that the 19S  
38 RP subunits RPN-6.1 and RPN-7 are crucial for the nuclear localization of the lid subunits RPN-8  
39 and RPN-9 in oocytes, potentially introducing *C. elegans* germ line as model to study proteasome  
40 assembly real-time. Collectively, our data support the premise that certain 19S RP proteasome  
41 subunits are playing tissue-specific roles, especially in the germ line. We propose *C. elegans* as a  
42 versatile multicellular model to study the diverse proteolytic and non-proteolytic roles that  
43 proteasome subunits play *in vivo*.

44

## 45 Introduction

46 The 26S proteasome is a ~2.5 MDa multi-subunit protein complex that maintains cellular  
47 homeostasis by degrading old, misfolded, mistranslated, and/or regulatory proteins in cells in both  
48 the cytoplasm and the nucleus (Hanna and Finley, 2007; Pack *et al.*, 2014; Bard *et al.*, 2018;  
49 Marshall and Vierstra, 2019). Recent evidence shows that specific proteasome subunits play tissue  
50 specific and/or non-proteolytic roles in various organisms (Pispa *et al.*, 2008; Bhat and Greer, 2011;  
51 Pispa, Matilainen and Holmberg, 2020). This includes roles in various cellular processes such as  
52 transcription, mRNA export, cell cycle regulation and chromosome structure maintenance (Ferdous,  
53 Kodadek and Johnston, 2002; Kwak, Workman and Lee, 2011; Seo *et al.*, 2017; Gómez-H *et al.*,  
54 2019). Models such as yeast and mammalian cell lines are widely used to characterize proteasome  
55 function, however, these unicellular models have limitations in comprehensively understanding the  
56 wide range of roles that individual proteasome subunits might be playing in different tissues and  
57 developmental stages (Hochstrasser, 1996; Bai *et al.*, 2019). Proper understanding of the assembly,  
58 structure, and function of the proteasome is crucial for understanding the pathology of diseases  
59 caused by irregular proteasome function, such as neurodegenerative diseases and cancer (Hanna and  
60 Finley, 2007; Hirano *et al.*, 2008; Myeku *et al.*, 2011; Kish-Trier and Hill, 2013; Saez and Vilchez,  
61 2014; Schmidt and Finley, 2014; Maneix and Catic, 2016; Walerych *et al.*, 2016).

62 High resolution structural characterization of the 26S proteasome in human and yeast via  
63 cryo-electron microscopy and atomic modeling has revealed the structure of the eukaryotic  
64 proteasome at atomic level (Groll *et al.*, 1997; Unno *et al.*, 2002; Beck *et al.*, 2012; Li *et al.*, 2013;  
65 Huang *et al.*, 2016). The mature 26S proteasome is composed of approximately 33 different, highly  
66 conserved protein subunits arranged into two 19S regulatory particles (RP) capping one cylindrical  
67 20S core particle (CP) (Figure 1A) (Kish-Trier and Hill, 2013). The 20S CP possesses the peptidase  
68 activity to degrade a protein substrate into smaller peptides, while the 19S RPs are responsible for  
69 recognizing, deubiquitinating and unfolding of polyubiquitinated substrates before importing  
70 substrates into the CP (Hanna and Finley, 2007; Finley, 2009). Each 19S RP is made up of two sub-  
71 complexes referred to as the lid and the base. The 19S RP lid is composed of non-ATPase subunits  
72 (Rpn3, Rpn5, Rpn6, Rpn7, Rpn8, Rpn9, Rpn11, Rpn12 and Sem1), while the base is composed of  
73 three non-ATPase subunits (Rpn1, Rpn2, and Rpn13) and six ATPase subunits (Rpt1, Rpt2, Rpt3,  
74 Rpt4, Rpt5, and Rpt6) (Kim, Yu and Cheng, 2011; Uprety *et al.*, 2012). A final subunit, Rpn10, is  
75 thought to bridge the lid and base subcomplexes thus joining the two together (Bard *et al.*, 2018). The  
76 *C. elegans* proteins comprising the 26S proteasome are diagrammed in Figure 1A and listed along  
77 with their human and yeast orthologs in Supplemental Table 1.

78 Assembly of the subunits to make a functional 26S proteasome is a highly conserved,  
79 multistep process. The 20S CP and 19S RP assemble independently as subcomplexes in the  
80 cytoplasm and then either can combine into the 26S in this compartment or can be imported into the  
81 nucleus and then assemble to form the mature 26S structure (Hirano *et al.*, 2006; Kusmierczyk *et al.*,  
82 2008; Pack *et al.*, 2014; Budenholzer *et al.*, 2017; Marshall and Vierstra, 2019). The 20S CP  
83 subcomplex assembly is known to require the aid of non-proteasomal chaperone proteins, while  
84 nuclear localization sequences (NLSs) on the alpha subunits of the 20S CP aid in the nuclear import  
85 of the subcomplexes (Brooks *et al.*, 2000; Hirano *et al.*, 2006; Kusmierczyk *et al.*, 2008;  
86 Budenholzer *et al.*, 2017; Wu *et al.*, 2018). The 19S RP lid and base subcomplexes assemble  
87 separately in the cytoplasm, before being imported into the nucleus where the separate modules dock  
88 on the assembled 20S CP to form the mature 26S proteasome (Tanaka *et al.*, 1990; Lehmann *et al.*,  
89 2002; Wendler *et al.*, 2004). Previous research in yeast has identified assembly chaperones for the  
90 19S RP base subcomplex and NLSs on two base subunits (yeast Rpt2 and Rpn2) aid in the nuclear

91 import of the base (Wendler *et al.*, 2004; Wendler and Enenkel, 2019). The yeast 19S RP lid  
92 subcomplex assembly consists first of the formation of Module 1 (Rpn5, Rpn6, Rpn8, Rpn9 and  
93 Rpn11) which then binds to lid particle 3 (Rpn3, Rpn7 and Sem1/Dss1) with Rpn12 serving as the  
94 linker (Budenholzer *et al.*, 2017). Interestingly, no external factors or assembly chaperones have yet  
95 been identified that assist in 19S RP lid subcomplex assembly, nor do any of the lid subcomplex  
96 proteins have known NLS sequences which could aid in the nuclear import of the 19S lid (Isono *et*  
97 *al.*, 2007; Budenholzer *et al.*, 2020). Therefore, further studies are required to fill the gap in our  
98 understanding of nuclear import of the 19S lid subcomplex.

99 While the role of the proteasome as the protein degradation machine in eukaryotes is well  
100 characterized, recent findings have sparked an interest in non-canonical and tissue-specific roles of  
101 individual proteasome subunits and/or subcomplexes. In mammals, tissue-specific proteasomes, such  
102 as the immunoproteasome, thymoproteasome, and spermatoproteasome contain structural variations  
103 in specific proteasome subunits leading to their tissue specificity (Kish-Trier and Hill, 2013; Uechi,  
104 Hamazaki and Murata, 2014; Gómez-H *et al.*, 2019; Motosugi and Murata, 2019). Studies done in  
105 mammals and *C. elegans* show that the 19S RP lid subunit PSMD11/RPN-6.1 can regulate  
106 proteolytic activity of the proteasome modulating the production of the other proteasome subunits  
107 thus increasing or decreasing proteolytic activity of the proteasome (Vilchez, Boyer, *et al.*, 2012;  
108 Vilchez, Morante, *et al.*, 2012; Lokireddy, Kukushkin and Goldberg, 2015). *C. elegans* studies have  
109 also uncovered proteasome subunits that are specific for germline development and fertility (Shimada  
110 *et al.*, 2006; Pispá *et al.*, 2008; Fernando, Elliot and Allen, 2020). RPN-10, RPN-12 and DSS-1  
111 (RPN15/SEM1) were each shown to play specific roles in germline sex determination and oocyte  
112 development (Shimada *et al.*, 2006; Pispá *et al.*, 2008; Fernando, Elliot and Allen, 2020).

113 Proper function of the 26S proteasome in the *C. elegans* hermaphrodite germ line is crucial  
114 for normal progression of meiosis and production of viable progeny (Glotzer, Murray and Kirschner,  
115 1991; Lee and Schedl, 2010). The two germ line arms of the nematode meet at a shared uterus. Each  
116 arm contains a distal mitotic pool of cells that enter meiosis as they move proximally (Figure 1B)  
117 (Hubbard and Greenstein, 2000; Hillers *et al.*, 2015). The germ line nuclei are open to the central  
118 rachis until the diplotene stage when cellularization of the developing oocytes is completed. The  
119 oocytes briefly arrest at the diakinesis stage prior to maturation, ovulation, and completion of the  
120 meiotic divisions (Greenstein, 2005). Feeding L4 *C. elegans* hermaphrodites dsRNA against  
121 individual 19S RP proteasome subunits results in F1 progeny lethality for most of the 19S RP  
122 subunits, the exceptions being RPN-9, RPN-10, RPN-12, DSS-1, and RPT-6 (Takahashi *et al.*, 2002;  
123 Shimada *et al.*, 2006; Pispá *et al.*, 2008; Fernando, Elliot and Allen, 2020). Despite the impact on  
124 embryonic viability, the effect of 19S RP subunit depletion on the reproductive capabilities of the  
125 RNAi-treated hermaphrodite mothers has not been examined. Here we report fertility defects  
126 observed in *C. elegans* hermaphrodites RNAi-depleted of individual 19S RP subunits starting from  
127 the L4 stage. Our study includes testing of 19S RP subunits that were not part of a 2002 study that  
128 reported the embryonic lethality effect of RNAi depletion of various of the 26S proteasomal subunits  
129 (Takahashi *et al.*, 2002).

130 Recently our labs separately characterized previously unknown roles for the proteasome in  
131 the germ line (Allen, Nesmith and Golden, 2014; Ahuja *et al.*, 2017; Fernando, Elliot and Allen,  
132 2020). We reported interactions between specific 19S RP subunits with a major meiotic kinase,  
133 WEE-1.3; we also described synaptonemal complex (SC) defects upon impairment of the 20S  
134 proteasome (Allen, Nesmith and Golden, 2014; Ahuja *et al.*, 2017; Fernando, Elliot and Allen, 2020).  
135 Here, we have embarked on a more detailed analysis of individual proteasomal subunit function in  
136 both the distal and proximal germ line of the *C. elegans* hermaphrodite. *C. elegans* is a powerful



137 genetic model whose optical transparency enables the observation of biological processes in real-time  
138 and the determination of the subcellular localization of fluorescently tagged proteins of interest  
139 during any stage of the *C. elegans* life cycle. To help elucidate individual proteasome subunit  
140 functions in the germ line, we began endogenously tagging 19S RP lid subunits with GFP or OLLAS,  
141 and present novel tissue-specific expression of RPN-6.1 and genetic requirements for the nuclear  
142 localization of lid subunits RPN-8 and RPN-9 in the *C. elegans* oocyte. We propose *C. elegans* as a  
143 versatile multicellular model to study the diverse proteolytic and non-proteolytic roles proteasome  
144 subunits play *in vivo* in specific tissues and cell types.

## 145 **Materials Methods**

### 146 **Strains**

147 All strains were maintained at 20°C on standard MYOB or NGM plates seeded with OP50  
148 unless mentioned otherwise (Brenner, 1974). Bristol strain N2 was used as the wild-type strain. Other  
149 strains used in this study are included in Supplemental Table 2.

### 150 **Strain generation**

151 Strains in this study were generated using CRISPR/Cas9 genome editing technology  
152 following the direct delivery method developed by Paix *et al.* 2015 (Paix *et al.*, 2015). The Co-  
153 CRISPR method using *unc-58* or *dpy-10* was performed to screen for desired edits (Arribere *et al.*,  
154 2014). Specificity of the crRNAs were determined using UCSC genome browser and  
155 <http://crispr.mit.edu/>. ApE plasmid editor was used for sequence analysis to select PAM sites and  
156 primer designs. The edits were confirmed using PCR. At least two independent strains were  
157 generated for each edit (except N-terminal GFP tagged RPN-7 for which only 1 strain was generated)  
158 and the resulting edited strains backcrossed with wild type (N2) at least 5 times and sequenced before  
159 being utilized.

160 GFP tags were generated by inserting Superfolder GFP sequence at the N-terminus  
161 immediately after the start ATG. Repair templates for the GFP strains were generated by PCR  
162 amplifying Superfolder GFP from pDONR221. All the strains generated in this study can be found in  
163 Table 2. The list of crRNAs (Horizon Discovery Ltd.) and primers (IDT Inc. or Eurofins genomics)  
164 used for generating repair templates and for PCR screening to confirm successful edits are listed in  
165 Supplemental Tables 3 and 4 respectively.

166 The C-terminal OLLAS-tag for RPN-6.1 was generated by inserting the 42bp OLLAS  
167 sequence, 5'-tccgattcgccaacgagctcggaccacgtctcatgggaaag-3' immediately before the stop codon  
168 (TGA) in *rpn-6.1*. An ssODN was used as the repair template and contained a minimum of 35bp  
169 homology arms to the genomic region 5' of the insertion site, the 42 bp OLLAS sequence, and then a  
170 minimum of 35 bp homology arms to the genomic region 3' of the insertion site (Supplemental Table  
171 4). Appropriate silent mutations were included in the ssODN to prevent recutting of the edited  
172 sequence by the crRNA. As the OLLAS sequence contains a SacI restriction enzyme site, PCR  
173 screening to confirm *rpn-6.1::OLLAS* edits was followed by SacI restriction enzyme digest and  
174 agarose gel electrophoresis.

### 175 **RNA interference (RNAi) treatment**

176 RNAi treatments were done via RNAi feeding as previously described (Timmons, Court and  
177 Fire, 2001; Allen, Nesmith and Golden, 2014; Boateng *et al.*, 2017). RNAi clones were obtained  
178 from either the Ahringer RNAi library (*rpn-1*, *rpn-10*, *rpn-13*, *dss-1*, *rpt-1*, *rpt-3*, *rpt-6*, *pbs-2*, and  
179 *pbs-4*) or Open Biosystems ORF-RNAi library (Huntsville, AL) (*smd-1*, *wee-1.3*, *cdk-1*, *rpn-2*, *rpn-*

180 3, *rpn-6.1*, *rpn-7*, *rpn-9*, *rpn-11*, *rpn-12*, *rpt-2*, *rpt-4*, and *rpt-5*). RNAi clones for *rpn-8* and *rpn-5*  
181 were generated in the lab (see below for details). All RNAi clones were freshly transformed into *E.*  
182 *coli* strain HT115 cells before usage. Either the L4440 empty vector or *smd-1(RNAi)* were used as a  
183 control RNAi condition for all RNAi treatments. *smd-1(RNAi)* was utilized because it activates the  
184 RNAi response yet has no reported reproductive phenotype in a wild-type genetic background. RNAi  
185 co-depletions were performed by measuring the optical density at 600nm wavelength of the RNAi  
186 overnight culture for each construct and then mixing the cultures in 1:1 ratio. We performed RNAi  
187 knockdown of the genes of interest by feeding the worms for a total of either 24 hours at 24°C  
188 starting from L4 stage (Figures 1-2, 6, 8 and Supplemental Figures 1-2) or 48 hours, from larval stage  
189 4 (L4) to day 2 adult at 20°C (Figures 3-5 and Supplemental Figures 3-5) as indicated.

## 190 RNAi clone generation

191 RNAi feeding clones for *rpn-5* and *rpn-8* were generated by TA cloning a PCR product  
192 containing a genomic sequence of the appropriate gene into the MCS of pL4440 RNAi feeding  
193 vector. To generate clones, a 1143bp region of *rpn-5* and 504bp region of *rpn-8* was PCR amplified  
194 using MyTaq™ DNA Polymerase (Bioline Cat. No. 21105). The following primers were used: for  
195 *rpn-5*, forward oAKA277 5'-aatggctatcgcaaagatgg-3' and oAKA278 reverse 5'-gtcagttgtgcacgttgct-  
196 3'; and for *rpn-8*, forward oAKA392 5'-gctttctcactgttatgtcg-3' and reverse oAKA393 5'-  
197 ccatgtcgaggaacctatgta-3'. In brief, the vector was linearized with EcoRV, gel-extracted (Bioline Cat.  
198 No. BIO-52059), T-tailed, desalted with a DNA Clean Concentrator kit (Zymo Research Cat. No.  
199 D4004), and then ligated with either of the previously mentioned PCR product using Quick-Stick  
200 ligase (Bioline Cat. No. BIO-27027). Newly generated RNAi clones were transformed into HT115  
201 cells and sequenced using the M13 forward universal primer to confirm successful cloning (Eurofins  
202 Genomics).

## 203 Fertility assays

204 24-hour total brood assays on RNAi-treated worms were performed using the previously  
205 published protocol with a minimum of 3 independent trials (Boateng *et al.*, 2017). Statistical analyses  
206 were performed in Microsoft Excel using the Student *T*-test to find significant differences between  
207 the average 24-hour brood of control and experimental RNAi conditions. Standard error of the mean  
208 (SEM) was calculated by dividing the standard deviation by the square root of the sample size.

## 209 Live Imaging

210 All fluorescent strains were treated with appropriate RNAi condition at 24°C for 24hrs before  
211 imaging. 10µl of anesthetic (0.1% tricane and 0.01% tetramisole in 1X M9 buffer) was added to a 3%  
212 agar pad on a slide and 10-15 live worms were transferred to the drop of anesthetic. A glass coverslip  
213 was slowly lowered to cover the samples and the coverslip edges were sealed with nail polish and  
214 allowed to dry before imaging. Images were obtained on a Nikon Ti-E-PFS inverted spinning-disk  
215 confocal microscope using a 60x 1.4NA Plan Apo Lambda objective. The microscope consists of a  
216 Yokowaga CSU-X1 spinning disk unit, a self-contained 4-line laser module (excitation at 405, 488,  
217 561, and 640nm), and an Andor iXon 897 EMCCD camera. Fluorescence intensities were quantified  
218 and image editing done using NIS-elements software.

## 219 Immunofluorescence of Proximal Germline

220 The tube staining method was performed on dissected gonads fixed in 3% paraformaldehyde  
221 and methanol (Chen and Arur, 2017). The samples are washed using 1X PBST (0.1% tween),  
222 blocked with 30% NGS and incubated with primary antibodies at 4°C overnight. Appropriate  
223 secondary antibodies were added and incubated at room temperature for 1-2 hours followed by three

224 washes with 1X PBST with DAPI included in the final wash and samples were mounted on a 3%  
225 agar pad with Vectashield mounting medium. The primary antibodies used in this study are: Rat  
226 monoclonal OLLAS epitope tag antibody (1:200, Novus Biologicals, Cat. No. NBP1-06713) and  
227 Rabbit anti-phospho-Histone H3 (Ser10) antibody (1:200, EMD Millipore Cat. No. 06-570).  
228 Secondary antibodies were goat-anti-rat Alexa Fluor 568nm and goat-anti-rabbit Alexa Fluor 488  
229 (1:1000, Invitrogen).

### 230 **Immunofluorescence of Synapsis Phenotypes in Distal Germline**

231 For the study of synapsis, germ lines from N2 worms exposed to 48 hours RNAi by feeding,  
232 were dissected in 1x Sperm Salt Buffer (50 mM PIPES pH 7.0, 25 mM KCl, 1 mM MgSO<sub>4</sub>, 45 mM  
233 NaCl, 2 mM CaCl<sub>2</sub>), followed by permeabilization with 2% Triton and then fixed in the same buffer  
234 containing 2% paraformaldehyde for 5 min. Slides were placed on a frosted metal plate on dry ice  
235 before removing the coverslip and then placed in 4°C absolute ethanol for 1 min. Slides were then  
236 washed three times for 10 min each in PBST (1x PBS, 0.1% Tween) plus 0.1% BSA and incubated  
237 overnight at 4°C with the primary antibodies diluted in PBST. Following three washes of 10 min each  
238 in PBST plus 0.1% BSA, slides were incubated in the dark at room temperature for 2 hours with  
239 secondary antibodies diluted in PBST. Following three 10 min washes with PBST, slides were  
240 counterstained with DAPI in the second wash and mounted using Prolong Gold antifade reagent with  
241 DAPI (Invitrogen). The primary antibodies used in this study are: Chicken anti-SYP-1 (1:1000,  
242 courtesy of Dr. Enrique Martinez-Perez) and Guinea Pig anti-XND-1 (1:2000) (Wagner *et al.*, 2010;  
243 Silva *et al.*, 2014). XND-1, a chromatin factor responsible for the global distribution of crossovers in  
244 *C. elegans*, was used as a control of the staining protocol allowing us also to identify the late  
245 pachytene stage in the germline. Secondary antibodies were goat-anti-chicken Alexa Fluor 488nm  
246 (1:2000, Invitrogen) and goat-anti-guinea pig Alexa Fluor 633nm (1:2000, Invitrogen).

## 247 **Results**

### 248 **Differential roles of 19S RP subunits in *C. elegans* reproduction and larval growth observed** 249 **when downregulated individually via RNAi**

250 We wanted to compare the effects of downregulation of each of the 19S RP lid and base  
251 subunits in *C. elegans* hermaphrodites. As expected RNAi knockdown of proteasome subunits led to  
252 significant brood size reductions compared to control RNAi (Figure 1C, p value < 0.01). Whereas the  
253 majority of 19S base subunit-knockdown animals had fewer than 6 offspring (<0.4% of control), *rpt-*  
254 *6(RNAi)* and *rpn-13(RNAi)* animals produced substantial numbers of eggs (~25% and ~63% of  
255 controls, Figure 1C) many of which hatched (Figure 1D). By contrast, knockdown of only half of the  
256 proteasome lid subunits severely reduced broods (<10 eggs); the remainder gave brood sizes 30-80%  
257 the size of controls (Figure 1C). Of those with substantial numbers of eggs, *rpn-5* severely reduced  
258 hatching, leading to few to no viable offspring (Figure 1D). These results replicate the findings of  
259 Takahashi et al (Takahashi *et al.*, 2002). In some instances, such as *rpt-6(RNAi)* and *rpn-9(RNAi)*, the  
260 hatched embryos develop into larvae but exhibit severe developmental defects, such as L1-L2  
261 developmental arrest and a protruded vulva phenotype, respectively (data not shown). This data,  
262 combined with previously published data, suggests while most of the lid and base subunits of 19S RP  
263 of the 26S proteasome play essential roles during *C. elegans* hermaphrodite reproduction, individual  
264 19S RP subunits may play differential roles in this process.

### 265 **Downregulation of most, but not all, 19S RP subunits causes dysfunction of the proteolytic** 266 **activity of the proteasome**

267 *In vivo* fluorescent reporter systems have been developed to qualitatively assess the proteolytic  
268 activity of the 26S proteasome in whole animals and in specific tissues under various conditions  
269 (Pispa, Matilainen and Holmberg, 2020). This technique takes advantage of a translational fusion of a  
270 mutated, non-hydrolysable ubiquitin moiety to a fluorescent reporter, thereby subjecting the  
271 fluorescent protein to continuous proteasomal degradation (Dantuma *et al.*, 2000; Hamer, Matilainen  
272 and Holmberg, 2010; Liu *et al.*, 2012). Here, we use the published IT1187 strain with a mutated  
273 ubiquitin fused to a GFP-tagged histone protein and driven by a germline specific promoter (*pie-*  
274 *I<sub>pro</sub>::Ub(G76V)::GFP::H2B::drp-1 3'UTR*) (Kumar and Subramaniam, 2018). GFP can thus be used  
275 as an indicator of germline proteolytic activity upon RNAi depletion of specific 19S RP subunits  
276 (Fernando, Elliot and Allen, 2020). If the proteolytic activity of the proteasome is normal, the non-  
277 hydrolysable mutated ubiquitin will target the GFP::H2B for continuous proteasomal degradation  
278 leading to dim or no GFP signal in the hermaphrodite germ line. Dysfunction of the proteolytic  
279 activity of the 26S proteasome leads to accumulation of Ub(G76V)::GFP::H2B resulting in bright  
280 GFP.

281 RNAi depletion of all of the lid subunits except *rpn-10*, *rpn-13*, *dss-1/rpn-15*, and *rpt-6*  
282 resulted in bright, nuclear, germline fluorescence of the Ub(G76V)::GFP reporter compared to  
283 control RNAi-treated germ lines (Figure 2A and Supplemental Figure 1). To compare proteolytic  
284 activity of these components, we quantified the GFP intensity in germ lines depleted of specific 19S  
285 RP subunits and imaged them under the same microscopy conditions (Figure 2B). This confirmed  
286 our qualitative observations that RNAi depletion of lid subunits does not uniformly impact germline  
287 proteolytic activity. For example, depletion of *rpt-2*, *rpn-9* or *rpn-12* resulted in only a modest  
288 increase in GFP fluorescence whereas RNAi of *rpn-2*, *rpn-7*, and *rpn-6.1* exhibited the greatest  
289 increase in fluorescence (Figure 2B). One trivial explanation for these differences in fluorescence and  
290 phenotypes are differential sensitivity of the proteasome genes to RNAi perturbation. We do not  
291 favor this explanation at least for *rpn-9* and *rpn-12*: our fluorescent reporters (described below)  
292 allowed us to ascertain that subunit expression can be effectively inhibited even for those subunits  
293 where we observe little to no phenotypic changes (Supplemental Figure 2). Therefore, we speculate  
294 that specific 19S RP proteasome subunits may contribute uniquely to the proteolytic activity in the  
295 germ line.

## 296 **Downregulation of specific 19S RP subunits causes cell cycle defects in the adult germ line**

297 The ubiquitin proteasome system plays a central role in cell cycle regulation (reviewed in  
298 (Zou and Lin, 2021)). In the *C. elegans* germ line, the mitotic cells reside in the distal tip, or  
299 proliferative zone (PZ), and provide the pool of cells that enter meiosis as they move proximally  
300 (Figure 1B). Under normal growth conditions on day one of adulthood, ~2.5% of cells have been  
301 reported to be in M phase based on staining with phospho-histone H3 (Kocsisova, Kornfeld and  
302 Schedl, 2019). Accordingly, under control RNAi conditions, we observed only rare metaphase or  
303 anaphase figures in the mitotic zone (Figure 3). By contrast, upon RNAi knockdown of most of the  
304 lid subunits (*rpn-3*, *rpn-5*, *rpn-6.1*, *rpn-7*, *rpn-8*, *rpn-9*, or *rpn-11*) and the base subunits *rpn-1* and  
305 *rpn-2*, we observed increased numbers of cells at metaphase or anaphase (Figure 3, Table 1, and  
306 Supplemental Figures 3, 4). We also observed severe defects in the PZ nuclei that are never seen in  
307 wild type: very small nuclei, fragmented nuclei, and chromosome fragments (Figure 3, arrowheads).  
308 Overall, these RNAi exposures led to shorter PZs with heterodisperse nuclear sizes and shapes  
309 compared to the orderly and uniform mitotic regions of controls. These phenotypes were also  
310 accompanied by a change in nuclear morphology at meiotic entry. In wild-type and control RNAi-  
311 exposed animals, the transition zone (TZ) nuclei (corresponding to leptotene/zygotene stages of  
312 meiosis) have a distinctive crescent shape (Hillers *et al.*, 2015). After 48h of exposure to proteasome



313 RNAi, the TZ nuclei were difficult to distinguish from the anaphase-like chromosomes in the mitotic  
314 region (Crittenden *et al.*, 2006; Hubbard, 2007) (Figure 3). In contrast to the profound proliferative  
315 defects described above, RNAi knockdown of the non-ATPase subunits *rpn-10*, *rpn-12*, *rpn-13* and  
316 *dss-1/rpn-15* did not alter PZ nuclear size or morphology and they appeared indistinguishable from  
317 control worms in this region (Supplemental Figure 5 and data not shown).

### 318 **Downregulation of specific 19S RP subunits compromises both SC assembly and SC** 319 **reorganization in late pachytene**

320 Previous work from our group and others has shown that a structurally compromised  
321 proteasome core complex results in severe defects both in synaptonemal complex (SC) assembly and  
322 in premature reorganization of the SC in late pachytene (Ahuja *et al.*, 2017; Prasada Rao *et al.*,  
323 2017). Based on these results, we wanted to interrogate how these events are affected when the 19S  
324 RP subunits are knocked down. In TZ nuclei, the SC central region proteins self-aggregate forming  
325 polycomplexes (PCs) (Goldstein, 1986). These PCs can be seen as bright foci using  
326 immunofluorescence or live imaging of fluorescently-tagged SC proteins (Figure 4) (Rog, Köhler  
327 and Dernburg, 2017). In wild type, PCs can be seen only in ~one to four nuclei because they  
328 disappear as the SC proteins polymerize along chromosomes to form the SC (Figure 4A) (Rog,  
329 Köhler and Dernburg, 2017) The PC region is extended if the SC cannot polymerize, for example due  
330 to defects in SC regulatory proteins, among others (Couteau and Zetka, 2005; Martinez-Perez and  
331 Villeneuve, 2005). Similar to what we observed with knockdown of the 20S subunit, RNAi  
332 knockdown of *rpn-1*, *rpn-2*, *rpn-3*, *rpn-5*, *rpn-6.1*, *rpn-7*, *rpn-8* or *rpn-11* resulted in an extended  
333 region of SYP-1 PCs (Figure 4C, D, Supplemental Figures 3, 4) (Ahuja *et al.*, 2017). As shown in  
334 Figure 4, both the number of nuclei that have PCs and the size of the PCs was increased in  
335 knockdown animals after 48hr of proteasome RNAi compared to control RNAi (Figure 4C, D). In the  
336 nuclei where PC persist, little to no SC is seen on chromosomes. In the most severe germ lines, PCs  
337 can be seen into mid-pachytene, well into the region that would normally be fully synapsed (compare  
338 Figure 4D vs 4A). In contrast to the robust phenotypes described above, the knockdown of the  
339 remainder of the non-ATPase subunits (*rpn-9*, *rpn-10*, *rpn-12*, *rpn-13* or *dss-1*) had no obvious effect  
340 on SC assembly or on PC size, number, or persistence (Figure 4B, Supplemental Figure 5). We note  
341 that *rpn-9* is distinct in having effects on mitotic proliferation but not on PC turnover/SC assembly.

342 In late pachytene, remodeling of SC occurs to facilitate bivalent formation: SYP proteins are  
343 removed from the long arm of the chromosome (relative to the crossover) and are retained and  
344 enriched on the short arm (MacQueen *et al.*, 2002; Colaiácovo *et al.*, 2003). The remodeling first  
345 becomes apparent in late pachytene nuclei by polarization of SC subunit into bright and dim patches  
346 seen by immunofluorescence (MacQueen *et al.*, 2002; Colaiácovo *et al.*, 2003). In the proteasome  
347 20S knockdown, we observed premature polarization of SYP with patches appearing more distally  
348 than in the wild-type controls (Ahuja *et al.*, 2017). Upon 19S RP subunit RNAi, we saw complete  
349 congruence between subunits that showed early PCs and those that presented with premature  
350 polarization (Figure 4C, D, Supplemental Figures 3, 4). In the most severe RNAi exposures, the  
351 polarization began in the mid-pachytene region (Figure 4D, Supplemental Figure 3). Similarly, those  
352 genes whose knockdown did not result in accumulation of PCs also did not show the premature  
353 polarization of the SC (Figure 4B, Supplemental Figure 5).

### 354 **Nuclear XND-1 levels are regulated by the proteasome**

355 In addition to the effects previously described for proteasome inhibition in the meiotic region  
356 of the germ line, we also observed that the proteasome is required for the proper down-regulation of

357 XND-1 (X non-disjunction factor 1) protein in late pachytene (Figure 5). XND-1 is a chromatin  
358 factor, responsible for the global distribution of meiotic crossovers in *C. elegans* (Wagner *et al.*,  
359 2010). In wild type, XND-1 protein is localized on autosomes from the mitotic tip of the germ line  
360 until late pachytene (Wagner *et al.*, 2010). At that time, XND-1 appears to dissociate from  
361 chromosomes and the nuclear XND-1 signal diminishes. In cellularized oocytes, prior to ovulation,  
362 the predominant pool of XND-1 protein is cytoplasmic where it remains until it is ultimately  
363 segregated into the developing germ cells of the embryo (Mainpal, Nance and Yanowitz, 2015). In  
364 contrast to wild-type and control RNAi-exposed animals, we observed that knockdown of *rpn-1*, *rpn-*  
365 *2*, *rpn-3*, *rpn-5*, *rpn-6.1*, *rpn-7*, *rpn-8* or *rpn-11*, the same subunits that altered the SC polymerization  
366 and restructuring, also led to defects in XND-1 turnover. In the late pachytene nuclei of these RNAi-  
367 exposed animals, XND-1 levels remained high and nucleoplasmic (Figure 5). Thus, we infer that  
368 these subunits are not required for the chromosomal association of XND-1 *per se*, but rather are  
369 responsible for the turnover and/or export of the non-chromosomally associated XND-1 pool.

### 370 **Downregulation of specific 19S RP subunits suppresses *wee-1.3(RNAi)* infertility and alters** 371 **WEE-1.3 localization in oocytes**

372 *C. elegans* oocytes, like oocytes of most sexually reproducing organisms, undergo meiotic  
373 arrest (Burrows *et al.*, 2006; Inoue *et al.*, 2006; Ruiz, Vilar and Nebreda, 2010). Oocyte meiotic  
374 arrest in *C. elegans* hermaphrodites is maintained by an inhibitory kinase WEE-1.3 phosphorylating  
375 the CDK-1 component of maturation promoting factor (MPF) and thus inactivating MPF (Lamitina  
376 and L'Hernault, 2002; Burrows *et al.*, 2006; Allen, Nesmith and Golden, 2014). Depletion of WEE-  
377 1.3 in *C. elegans* causes precocious oocyte maturation resulting in infertility (Burrows *et al.*, 2006).  
378 A large RNAi suppressor screen identified 44 suppressors that when co-depleted with WEE-1.3  
379 suppressed the infertility defect (Allen, Nesmith and Golden, 2014). Five of the suppressor genes  
380 were subunits of the 19S RP. However not all of the 19S RP subunits were included, or identified as  
381 positives, in the aforementioned screen (Allen, Nesmith and Golden, 2014). Therefore, we  
382 systematically screened each of the 19S RP subunits to determine if there are additional subunits  
383 whose depletion suppresses *wee-1.3(RNAi)* induced infertility.

384 Hermaphrodites fed *wee-1.3(RNAi)* are infertile, averaging less than one egg per adult  
385 hermaphrodite (Figure 6). In the absence of CDK-1, WEE-1.3 is dispensable. Accordingly, *cdk-*  
386 *1(RNAi)* suppresses *wee-1.3(RNAi)* infertility and therefore serves as a positive control in these  
387 studies (Figure 6A) (Burrows *et al.*, 2006). Significant increases in brood sizes were seen when  
388 WEE-1.3 was co-depleted with 8 out of 13 of the 19S lid subunits, but only seen with co-depletion of  
389 one of the 19S base subunits, RPT-2 (Figure 6A). Depletion of the remaining 5 base units were  
390 unable to suppress, similar to the negative control co-depleted with WEE-1.3 (Figure 6A).

391 WEE-1.3 is mainly localized to the perinuclear region, but also can be seen in the cytoplasm  
392 and ER (Allen, Nesmith and Golden, 2014). Depletion of most 19S RP subunits in an endogenously  
393 GFP tagged WEE-1.3 strain [WDC2 – *gfp::wee-1.3(ana2)*] caused aberrant nuclear accumulation of  
394 WEE-1.3 (Figure 6B). RNAi of four of the 19S RP subunits that failed to suppress *wee-1.3(RNAi)*  
395 sterility, RPN-10, RPN-13, DSS-1/RPN-15 and RPT-6, also showed no change in GFP::WEE-1.3  
396 localization (Figure 6B, Table 2, and data not shown). However, since we previously reported that  
397 *rpn-10(ana7)*, a genetic null, results in nuclear accumulation of GFP::WEE-1.3 in oocytes, it is  
398 possible that our RNAi depletions of RPN-13, DSS-1 or RPT-6 did not give sufficient knockdown to  
399 elicit an alteration in perinuclear WEE-1.3 localization (Fernando, Elliot and Allen, 2020). However,  
400 our previous study also reported that chemical inhibition of the proteolytic activity of the proteasome  
401 with Bortezomib neither suppressed *wee-1.3(RNAi)* infertility nor induced nuclear accumulation of



402 WEE-1.3 (Fernando, Elliot and Allen, 2020). Therefore, we favor the conclusion that a fully intact  
403 19S RP is required for the proper localization of WEE-1.3 in oocytes and that this role is independent  
404 of the proteasome's role in proteolysis.

#### 405 **Ubiquitous somatic and germline expression of 19S RP lid subunits RPN-7, RPN-8, and RPN-9**

406 The transparency of *C. elegans* makes it an excellent model to conduct live imaging of  
407 fluorescently tagged proteins and is useful to study highly dynamic protein complexes such as the  
408 26S proteasome. To better understand the spatiotemporal expression of 19S RP subunits *in vivo* and  
409 ultimately to perform future biochemical analyses, we set out to endogenously tag each of the 19S  
410 RP subunits with GFP or OLLAS. We previously reported that an endogenous GFP::RPN-12 strain  
411 exhibits somatic and germline expression (Fernando, Elliot and Allen, 2020). N-terminal GFP  
412 fusions with RPN-7, RPN-8, or RPN-9 showed ubiquitous expression in both the nuclei and  
413 cytoplasm of germline and somatic cells, including developing oocytes (Figure 7A and Supplemental  
414 Figure 6). This subcellular expression matches that determined by antibody staining against subunits  
415 of the proteasome core particle in *C. elegans* and in other systems (Brooks *et al.*, 2000; Mikkonen,  
416 Haglund and Holmberg, 2017; Kumar and Subramaniam, 2018; Fernando, Elliot and Allen, 2020).  
417 Importantly, all three of these strains exhibited no effect on lifetime brood size and only a moderate  
418 reduction in lifespan when compared to wild-type control animals (data not shown).

#### 419 **Expression of the 19S RP lid subunit RPN-6.1a is restricted to the body wall muscle**

420 While the 19S RP subunits (RPN-7, -8, -9, and -12) all exist as a single protein isoform, the  
421 RPN-6.1 subunit has two protein isoforms, A and B, that differ by an extension of the N-terminus in  
422 RPN-6.1A (Supplemental Figure 7) (Wormabase, 2022). A strain endogenously tagging the N-  
423 terminus of RPN-6.1A with GFP shows nuclear and cytoplasmic GFP expression restricted to the  
424 body wall muscle cells of the animal (Figure 3B, strain WDC3 *rpn-6.1a(ana3[gfp::rpn-6.1a])*). Since  
425 an N-terminal fusion of RPN-6.1B would impact expression of RPN-6.1A, we instead attempted to  
426 infer its expression from an endogenous GFP tag to the C-terminus of RPN-6.1, which would  
427 simultaneously tag both RPN-6.1 isoforms (Supplemental Figure 7). Unfortunately, we were unable  
428 to obtain viable or fertile RPN-6.1::GFP animals, suggesting GFP interfered with the proper folding  
429 or function of RPN-6.1. Instead, we were able to create a functional gene fusion using a small epitope  
430 tag, OLLAS (WDC12 *rpn-6.1(ana12[rpn-6.1a::ollas])*). Lifespan and lifetime brood assays of the  
431 *gfp::rpn-6.1a* and *rpn-6.1::ollas* strains demonstrated that the N-terminal tag had no effect compared  
432 to wild-type control animals, while the C-terminal OLLAS tag results in a slightly reduced lifetime  
433 average brood and lifespan compared to wild-type control (data not shown).

434 We immunostained dissected RPN-6.1::OLLAS animals with an anti-OLLAS antibody and as  
435 predicted, we observed staining in the nuclei and cytoplasm of germ line and intestinal cells (Figure  
436 7C). Since GFP::RPN-6.1A fluorescence was restricted to the body wall muscle, the anti-OLLAS  
437 staining that we observed in the germ line and intestine can be inferred to be due to the expression of  
438 RPN-6.1B. Interestingly, sperm did not exhibit expression of either isoform RPN-6.1A or B. We  
439 hypothesize that this may be due to the presence of a sperm-specific ortholog of *rpn-6.1*, *rpn-6.2*, that  
440 is reported as expressed in sperm (Dr. Lynn Boyd personal communication and WormBase).  
441 Additionally, neither *gfp::rpn-6.1a* nor *rpn-6.1::ollas* animals exhibit expression in the pharynx,  
442 unlike other tagged proteasomal subunits, for example *gfp::rpn-9* (data not shown). This implies that  
443 the pharynx might either have a pharyngeal-specific proteasomal subunit orthologous to RPN-6.1 or  
444 that the pharyngeal proteasome does not utilize an RPN-6.1 subunit for function.

## 445 **RPN-6.1 and RPN-7 are required for nuclear localization of the 19S RP subcomplex**

446 Yeast and mammalian studies have shown that the 26S proteasome can assemble in either the  
447 cytoplasm or the nucleus (Satoh *et al.*, 2001; Yashiroda *et al.*, 2008; Kaneko *et al.*, 2009; Murata,  
448 Yashiroda and Tanaka, 2009; Kish-Trier and Hill, 2013; Pack *et al.*, 2014; Bai *et al.*, 2019; Wendler  
449 and Enenkel, 2019). The subunits first assemble as subcomplexes in the cytoplasm with the help of  
450 chaperones and can then be imported into the nucleus where they combine to form the mature 26S  
451 proteasome forms (Le Tallec *et al.*, 2007; Li *et al.*, 2007; Murata, Yashiroda and Tanaka, 2009;  
452 Wendler and Enenkel, 2019). In yeast, the 20S CP subcomplexes assemble by at least five  
453 proteasome assembly chaperones, PAC1-PAC4 and POMP (Le Tallec *et al.*, 2007; Bai *et al.*, 2019).  
454 Nuclear localization of these 20S CP subcomplexes use the nuclear localization sequences (NLS) of  
455 the alpha subunits (Enenkel, 2014; Budenholzer *et al.*, 2020). The 19S RP assembly occurs in several  
456 steps where the lid and base take different routes to the nucleus before joining the 20S CP to  
457 complete 26S proteasome assembly (Isono *et al.*, 2007). The base assembly in yeast requires several  
458 chaperones, Nas6, Nas2, Hsm5 and Rpn14, and its nuclear localization is known to be carried out by  
459 NLS sequences in the RPN2 and RPT2 subunits (Wendler *et al.*, 2004; Funakoshi *et al.*, 2009;  
460 Roelofs *et al.*, 2009; Enenkel, 2014; Bai *et al.*, 2019). Meanwhile the yeast lid subcomplex forms into  
461 two intermediate modules before joining to form the full lid (Bai *et al.*, 2019). The two intermediate  
462 modules consists of RPN3, RPN7, and RPN15, and of RPN6, RPN8, RPN9, and RPN11 (Isono *et al.*,  
463 2007; Bai *et al.*, 2019). RPN6 and RPN7 then interact to form the complete lid subcomplex, before  
464 the last lid subunit, RPN12, joins the subcomplex (Tomko and Hochstrasser, 2011). The lid subunits  
465 do not possess canonical NLS sequences, therefore the nuclear localization mechanism of the lid  
466 subcomplex remains unclear.

467 Our previous results demonstrated a nuclear pool of many 19S RP subunits. To test if any *C.*  
468 *elegans* 19S subunits are necessary for the nuclear localization of lid subcomplex components, we  
469 downregulated individual 19S RP lid subunits via RNAi and asked whether localization of other 19S  
470 RP subunits was affected. RNAi depletion of either RPN-6.1 or RPN-7, but not other lid subunits,  
471 impacted the nuclear signal of GFP::RPN-8 and GFP::RPN-9 in oocytes (Figure 8A-B, Supplemental  
472 Figure 2). By contrast, these depletions did not impact GFP::RPN-7 and GFP::RPN-12 localization  
473 (Figure 8B). Together our data show that RPN-6.1 and RPN-7 are required for the nuclear  
474 localization of the 19S RP lid particle subcomplexes.

## 475 **Discussion**

476 We propose that the *C. elegans* germ line can serve as a model to study proteasome subunit  
477 dynamics *in vivo*. Endogenous fluorescent-labeling of specific subunits showed cellular and  
478 subcellular localization of those subunits that has not been clearly reported by previous studies. Our  
479 depletion studies for each the 19S regulatory particle subunits have uncovered catalytic and structural  
480 roles for the whole proteasome, lid-specific functions, as well as evidence for moonlighting roles of  
481 specific subunits.

482 Individual subunits of the 19S regulatory particle (RP) of the *C. elegans* proteasome  
483 contribute to different extents to a range of germ line processes. RNAi depletion of 13 out of 19  
484 subunits of the 19S RP (Table 2) caused very high rates of embryonic lethality in progeny of treated  
485 mothers (hatching <20%; where 12/13 were <5%). All 13 of these subunits also caused severe  
486 impairment of the proteolytic activity of the proteasome as measured with the germ line,  
487 Ub(G76V)::GFP::H2B reporter. Eight of the 13 were tested for additional germ line defects and all  
488 exhibited impaired mitotic divisions, SC defects, aberrant WEE-1 localization, and retention of

489 XND-1 in late pachytene nuclei. This latter phenotype is particularly noteworthy because it occurs  
490 at/near the time when a) profound changes in oocyte transcription and chromatin are occurring to  
491 prepare the oocyte for embryonic development and b) a subset of nuclei is culled by apoptosis.  
492 Whether the proteasome plays a pivotal role(s) in promoting these transitions deserves further  
493 investigation. With the exception of WEE-1.3 localization, these phenotypes were also impacted by  
494 bortezomib and knockdown of one or more core proteasome subunits. Together these data support  
495 the conclusion that proteasomal activity plays critical and essential roles throughout the *C. elegans*  
496 hermaphrodite germ line to ensure proper oocyte development and ensuing embryonic viability.

497 The depletion of the *rpn-9* and *rpn-12* subunits moderately impaired proteolytic activity of  
498 the proteasome (Figure 2B and Supplemental Figure 1) without severely affecting brood sizes (~50%  
499 and ~66% reductions) or hatching rates (~50% and ~20% reductions, respectively). One possible  
500 explanation is that the assays reflect differential requirements for proteasome function in different  
501 cells: Ub(G76V)::GFP expression is assayed in the meiotic germ line and developing oocytes; brood  
502 sizes reflect a combination of mitotic divisions, apoptosis, and oocyte maturation; and hatching rates  
503 reflect the impacts on the laid eggs. Consistent with this interpretation, *rpn-9(RNAi)* but not *rpn-*  
504 *12(RNAi)* exhibited mitotic zone defects which could explain the brood size defects in the former.  
505 Alternatively, there may be regional or cell type-specific differences in the RNAi efficiency for these  
506 subunits or different sensitivities of these phenotypic readouts to proteasome impairment. A final  
507 possibility, relating specifically to *rpn-12*, is the previously proposed idea that *rpn-10* and *rpn-12* are  
508 redundant and can compensate for one another during oocyte development (Takahashi *et al.*, 2002;  
509 Shimada *et al.*, 2006; Fernando, Elliot and Allen, 2020).

510 One of our surprising observations is that RNAi directed against *dss-1*, *rpn-13*, *rpn-10*, and  
511 *rpt-6* had mild to no effect on many of the processes examined. While these results may indicate that  
512 the RNAi is inefficient at knocking down these subunits, we note that all four knockdowns did have a  
513 mild effect on brood size, producing 25-80% of the number of eggs as wild type, strongly suggesting  
514 the RNAi is working. Our data and previously published studies using mutant analyses have shown  
515 that RPN-10, RPN-12 and DSS-1 play significant roles in the hermaphrodite germline sex  
516 determination pathway, oogenesis, and later on during larval development and growth (Shimada *et*  
517 *al.*, 2006; Pispas *et al.*, 2008; Fernando, Elliot and Allen, 2020). Although 99% of the embryos  
518 hatched upon knockdown of RPN-13, most larvae presented a ruptured vulva phenotype (data not  
519 shown). These data strongly suggest that RNAi depletion of these subunits is functional. One  
520 possible model for the lack of strong phenotype is that other proteostasis mechanisms may be  
521 upregulated when these subunits are inactivated, thereby supporting development and fertility with a  
522 partially compromised proteasome. Prior studies have revealed such cross-pathway feedback  
523 mechanisms, but whether all tissues respond similarly is not clear (Li, Li and Wu, 2022).

524 RPN-10, RPN-13 and DSS-1 are known as ubiquitin receptors of the 26S proteasome, but  
525 there is evidence to suggest that these subunits confer substrate specificity and do not function as  
526 global receptors of polyubiquitinated proteasome substrates (Shimada *et al.*, 2006; Paraskevopoulos  
527 *et al.*, 2014). In mammalian cells, RPN10 can compensate for loss of RPN13, and vice versa,  
528 presumably because of their shared role in ubiquitin-binding (Hamazaki, Hirayama and Murata,  
529 2015). It would be interesting to test whether similar compensation happens in the worm. RPN-1 is  
530 the only other 19S RP subunit thought to have ubiquitin-binding activity. Since loss of RPN-1 is  
531 much more severe, we postulate that loss of only RPN-10, RPN-13, or DSS-1 may not sufficiently  
532 impair the ability of the other subunits to feed substrates to RPN-1 for movement through the base  
533 and into the proteasome core. Takahashi *et al.* previously showed redundancy between *rpn-10* and  
534 *rpn-12* (Takahashi *et al.*, 2002). Structural analyses place RPN-10 at the interface of the 19S base

535 and lid, linking RPN-1 to RPN-12 (see Figure 1A). In the absence of RPN-10, these two subunits  
536 may directly interact, as suggested by dynamic models of proteasome structure with and without  
537 substrate (Bard *et al.*, 2018). Alternatively, however, these data may suggest that the 19S lid adopts a  
538 novel structure in the worm germ line. Existence of tissue-specific proteasomes is not unprecedented  
539 but the study of these variants is still into its infancy (Kish-Trier and Hill, 2013; Uechi, Hamazaki  
540 and Murata, 2014; Gómez-H *et al.*, 2019; Motosugi and Murata, 2019). These modified proteasomes  
541 provide a mechanism to adapt to tissue-specific needs. Determining whether the *C. elegans* 19S RP  
542 adopts a germ line specific configuration is an important avenue for future investigation.

543 Most 19S RP subunit depletions caused aberrant nuclear accumulation of GFP::WEE-1.3.  
544 However, bortezomib treatment did not alter the localization of WEE-1.3. Bortezomib works by  
545 binding to the  $\beta 5$  subunit of the 20S CP and inhibiting its peptidase activity, whereas depletion of  
546 specific 19S subunits may weaken 19S RP and 20S CP interactions, destabilizing part or all of the  
547 proteasome structure or may impair 19S RP-substrate interactions (Adams *et al.*, 1999; Bai *et al.*,  
548 2019; Thibaudeau and Smith, 2019). Therefore, we speculate that an intact, stable proteasome  
549 structure, but not its activity, is required for the proper perinuclear localization of WEE-1.3 (Figure  
550 8B). While proteolytic roles of the proteasome are well established, growing evidence supports  
551 additional roles for intact proteasome (or its subcomplexes), including in the cell cycle, transcription,  
552 and chromatin organization (Nishiyama *et al.*, 2000; Geng, Wenzel and Tansey, 2012; Seo *et al.*,  
553 2017). One possibility is that the proteasome tethers WEE-1.3 to the perinuclear region, potentially  
554 even the nuclear pore complex, through protein-protein interactions (Albert *et al.*, 2017).

555 Our studies also point to differences between the behavior of the 19S lid and base. With  
556 exception of *rpt-2*, none of 19S base subunits were able to suppress *wee-1(RNAi)*-induced sterility,  
557 whereas many of the lid subunits did suppress. These data could be explained if the lid has  
558 independent, non-proteasomal functions or that it combines with other proteins to make an alternative  
559 regulatory particle. In favor of the former model, we previously showed that proteasome inhibition  
560 by bortezomib failed to suppress *wee-1.3(RNAi)* infertility suggesting that the misregulation of  
561 protein turnover is not driving the oocyte maturation defect of *wee-1.3* depletion (Fernando, Elliot  
562 and Allen, 2020). The mechanism by which the suppression of *wee-1.3(RNAi)* infertility occurs is  
563 still unknown but future studies may offer new insights into the regulation of this highly conserved  
564 WEE-1.3/Myt1 cell cycle kinase.

565 Previous research in *C. elegans* showed that RPT-6 has a role in transcription. RPT-6  
566 interacts with the transcription factor ELT-2 to regulate expression of immune response genes and  
567 this role is independent of the proteolytic activity of the proteasome (Olaitan and Aballay, 2018).  
568 Therefore, our observation that depletion of RPT-6 does not affect germline proteolytic function, but  
569 rather causes a reduced brood and larval arrest can mean two things: either RPT-6 is a developmental  
570 stage specific proteasome subunit that is essential for proteolytic function of the proteasome only  
571 during larval development; or, RPT-6 may play non-proteolytic roles in the *C. elegans* germ line  
572 because depletion of RPT-6 causes a reduced brood but overall germ line proteolytic function is not  
573 affected. While we favor, off-proteasome functions for RPT-6 in controlling oocyte quality, further  
574 studies are needed to elucidate RPT-6 function. It is noteworthy that RPT-6 is known to play non-  
575 proteolytic roles in transcription in both yeast and mammalian cells (Chang *et al.*, 2001; Gonzalez *et*  
576 *al.*, 2002; Lee *et al.*, 2005; Uprety *et al.*, 2012).

577 Endogenous GFP tagging of a number of the 19S proteasomal subunits indicated strong  
578 expression throughout the germ line of *C. elegans*, in addition to ubiquitous, somatic expression.  
579 However, we are the first to report isoform-specific localization of RPN-6.1 in *C. elegans*. With



580 isoform RPN-6.1A being expressed only in the body wall muscles while RPN-6.1::OLLAS (which  
581 marks both Isoforms A and B) is expressed throughout the hermaphrodite female germ line but is  
582 distinctly absent from both sperm and the pharynx. Since downregulation of RPN-6.1 causes severe  
583 dysfunction of the proteolytic activity of the proteasome, we speculate that there is likely to be other  
584 RPN-6.1 variant(s) that functions in the pharynx and sperm (Vilchez, Morantte, *et al.*, 2012;  
585 Fernando, Elliot and Allen, 2020). Indeed, RPN-6.2, a RPN-6 paralog, has recently been identified as  
586 sperm-specific (personal communication, Lynn Boyd). Sperm-specific proteasome subunits have  
587 been described in various systems and may exist to meet the massive protein turnover for the histone  
588 to protamine transition or to facilitate fertilization (Belote and Zhong, 2009; Sutovsky, 2011; Uechi,  
589 Hamazaki and Murata, 2014; Zhang *et al.*, 2019; Palacios *et al.*, 2021). One critical remaining  
590 question is whether the different isoforms reflect tissue-specific modifications or adaptations to  
591 specific substrate in these tissues. Further analysis of these questions in the worm will enhance our  
592 knowledge of the diverse and dynamic regulation of the proteasome in different tissues.

593 RPN-6.1/Rpn6/PSMD11 is one of the subunits known to play a crucial role in proteasome  
594 stability and lid subcomplex assembly (Santamaría *et al.*, 2003; Isono *et al.*, 2005; Bai *et al.*, 2019).  
595 Our results suggest that *C. elegans* RPN-6.1 and RPN-7 aid in the nuclear localization of the lid  
596 subcomplex. Our future studies will focus on determining the mechanism by which RPN-6.1 and  
597 RPN-7 aid in this process. Interestingly, neither RPN-6.1 nor RPN-7 possess canonical NLS  
598 sequences, implying either the proteins have cryptic NLSs or that additional binding partners are  
599 required for nuclear localization of the 19S RP lid subcomplexes. The endogenously-tagged strains  
600 that we generated will be beneficial in both biochemical and genetic experiments to identify such  
601 sequences or chaperones binding partners. Obtaining a complete set of fluorescently tagged lid  
602 subunits will aid in further elucidating the mechanism by which the lid subcomplex assembles and  
603 becomes nuclear localized using the *C. elegans* germ line as a model system.

604 The spatiotemporal and depletion analyses of the *C. elegans* proteasome subunits in this study  
605 reveal differential roles being played by specific subunits and provides crucial information to fill the  
606 knowledge gaps in our understanding of the 26S proteasome and its many functions. Generation of  
607 these endogenously fluorescently tagged 19S RP subunits and future tagged subunits will serve as  
608 valuable resources for future proteasome subunits. Our current findings in the multicellular model *C.*  
609 *elegans* and the future ones that stem from this research have tremendous potential to transform the  
610 proteasome field and can be translated into better understanding human proteasome function.

611

612

613

614

615 TABLES

616

617 **Table 1: Percentage of worms that presented cell cycle defects after knocking down proteasome**  
 618 **non-ATPase subunits.**

| Gene RNAi (n)       | Normal mitotic tip | Abnormal mitotic tip <sup>s</sup> |                            |
|---------------------|--------------------|-----------------------------------|----------------------------|
|                     |                    | ↑ M phase nuclei                  | Small or fragmented nuclei |
| <i>rpn-1</i> (10)   |                    | 80%                               | 100%                       |
| <i>rpn-2</i> (10)   | 10%                | 90%                               | 70%                        |
| <i>rpn-3</i> (7)    |                    | 100%                              | 100%                       |
| <i>rpn-5</i> (9)    |                    | 78%                               | 100%                       |
| <i>rpn-6.1</i> (11) | 9%                 | 91%                               | 82%                        |
| <i>rpn-7</i> (10)   |                    | 90%                               | 100%                       |
| <i>rpn-8</i> (10)   |                    | 100%                              | 90%                        |
| <i>rpn-9</i> (9)    | 44%                | 56%                               | 56%                        |
| <i>rpn-10</i> (6)   | 100%               |                                   |                            |
| <i>rpn-11</i> (8)   |                    | 88%                               | 100%                       |
| <i>rpn-12</i> (10)  | 100%               |                                   |                            |
| <i>rpn-13</i> (11)  | 100%               |                                   |                            |
| <i>dss-1</i> (9)    | 100%               |                                   |                            |
| N2 WT (10)          | 100%               |                                   |                            |

619



620 **Table 2: Summary of the germline phenotypes associated with RNAi-depletion of the various**  
 621 **19S RP subunits.**

| Gene RNAi         | Emb Lethal # | Effect on Brood <sup>a</sup> | Effect on Proteolytic Activity <sup>&amp;</sup> | MZ defects <sup>\$</sup> | PCs + Premature Polarization <sup>^</sup> | Defective XND-1 turnover <sup>@</sup> | Aberrant nuclear WEE-1.3 <sup>¶</sup> | Suppress <i>wee-1.3(RNAi)</i> infertility <sup>§</sup> |
|-------------------|--------------|------------------------------|-------------------------------------------------|--------------------------|-------------------------------------------|---------------------------------------|---------------------------------------|--------------------------------------------------------|
| <i>rpn-1</i>      | 1            | 1                            | +                                               | +                        | +                                         | +                                     | +                                     | no                                                     |
| <i>rpn-2</i>      | 1            | 1                            | +                                               | +                        | +                                         | +                                     | +                                     | +                                                      |
| <i>rpn-3</i>      | 1            | 1                            | +                                               | +                        | +                                         | +                                     | +                                     | +                                                      |
| <i>rpn-5</i>      | 1            | 2                            | +                                               | +                        | +                                         | +                                     | +                                     | +                                                      |
| <i>rpn-6.1</i>    | 1            | 1                            | +                                               | +                        | +                                         | +                                     | +                                     | +                                                      |
| <i>rpn-7</i>      | 1            | 1                            | +                                               | +                        | +                                         | +                                     | +                                     | +                                                      |
| <i>rpn-8</i>      | 1            | 1                            | +                                               | +                        | +                                         | +                                     | +                                     | +                                                      |
| <i>rpn-9</i>      | 3            | 3                            | +                                               | +                        | no                                        | no                                    | +                                     | +                                                      |
| <i>rpn-10</i>     | 5            | 2                            | no                                              | none                     | no                                        | no                                    | no                                    | no                                                     |
| <i>rpn-11</i>     | 1            | 1                            | +                                               | +                        | +                                         | +                                     | +                                     | +                                                      |
| <i>rpn-12</i>     | 4            | 2                            | +                                               | none                     | no                                        | no                                    | +                                     | no                                                     |
| <i>rpn-13</i>     | 5            | 3                            | no                                              | none                     | no                                        | no                                    | no                                    | no                                                     |
| <i>dss-1</i>      | 4            | 3                            | no                                              | none                     | no                                        | no                                    | no                                    | no                                                     |
| <i>rpt-1</i>      | 1            | 1                            | +                                               | n.d.                     | n.d.                                      | n.d.                                  | +                                     | no                                                     |
| <i>rpt-2</i>      | 1            | 1                            | +                                               | n.d.                     | n.d.                                      | n.d.                                  | +                                     | +                                                      |
| <i>rpt-3</i>      | 1            | 1                            | +                                               | n.d.                     | n.d.                                      | n.d.                                  | +                                     | no                                                     |
| <i>rpt-4</i>      | 2            | 1                            | +                                               | n.d.                     | n.d.                                      | n.d.                                  | +                                     | no                                                     |
| <i>rpt-5</i>      | 1            | 1                            | +                                               | n.d.                     | n.d.                                      | n.d.                                  | +                                     | no                                                     |
| <i>rpt-6</i>      | 3            | 2                            | no                                              | n.d.                     | n.d.                                      | n.d.                                  | no                                    | no                                                     |
| <b>Control</b>    | 5            | 4                            | no                                              | none                     | no                                        | no                                    | no                                    | no                                                     |
| <b>Bortezomib</b> | 1            | 1                            | +                                               | n.d.                     | n.d.                                      | n.d.                                  | no                                    | no                                                     |

622 # 1 <5% hatching; 2= 5-39%; 3 = 40-74%; 4 = 75-97%; 5 = no defect.

623 <sup>a</sup>Average 24 hour brood: 1 < 10 progeny; 2 = 11-75; 3 = 76-150; 4 >150.

624 <sup>&</sup> No does not result in statistically significant difference in expression of germ line proteolytic  
 625 reporter. + results in a statistically significant increase in expression of the germ line proteolytic  
 626 report.

627 <sup>\$</sup> (+) Cell cycle defects in the adult germ line after knocking down RP subunits by RNAi. None = no  
 628 cell cycle defects in the adult germ line after knocking down RP subunits by RNAi.

629 <sup>^</sup> (+) SC polycomplexes and premature polarization of SYP-1 after knocking down RP subunits by  
 630 RNAi. No = no SC polycomplexes and premature polarization of SYP-1 after knocking down RP  
 631 subunits by RNAi.

632 <sup>@</sup> (+) Defective XND-1 turnover in late pachytene after knocking down RP subunits by RNAi. No =  
 633 normal XND-1 turnover in late pachytene after knocking down RP subunits by RNAi.

634 <sup>¶</sup> No = no WEE-1.3 nuclear localization. + results in aberrant WEE-1.3 nuclear localization.

635 <sup>§</sup> No does not result in a statistically significant suppression of *wee-1.3(RNAi)* infertility. + results in  
 636 a statistically significant suppression of *wee-1.3(RNAi)* infertility.

## 637 Figure Legends

638 **Figure 1. Depletion of 19S RP subunits of the 26S proteasome in *C. elegans* hermaphrodites**  
639 **caused reduced brood and/or embryonic lethality.** (A) Schematic of eukaryotic 26S proteasome  
640 and its subunits. (B) Schematic of an adult *C. elegans* hermaphrodite germ line (one gonad arm). (C)  
641 Average 24 hr brood of *C. elegans* hermaphrodites RNAi-depleted of either a control gene (n=152),  
642 any of the 19 subunits of the 19S RP (n=10-83), or a 20S CP subunit, PBS-4 (n=36). Brood is shown  
643  $\pm$  SEM and calculated from at least three independent trials. All RNAi conditions compared to  
644 control exhibit a p-value < 0.0001. (D) Percent of hatched (black bars) and unhatched (grey bars)  
645 progeny of hermaphrodites treated with either *control(RNAi)* or the indicated *proteasome*  
646 *subunit(RNAi)*.

647 **Figure 2. Depletion of most 19S RP subunits severely decreases proteolytic activity.** (A) Germ  
648 line images of Ub(G76V)::GFP::H2B animals treated with the indicated RNAi. Representatives  
649 images of normal germline proteolytic activity [*control(RNAi)* and *rpt-6(RNAi)*], severe dysfunction  
650 of proteolytic activity [*rpn-11(RNAi)*], and moderate dysfunction of proteolytic activity [*rpn-*  
651 *9(RNAi)*]. A gonad arm is outlined with white dashed lines. (B) Average fluorescence intensity of  
652 Ub(G76V)::GFP::H2B germ lines treated with either RNAi against a control (n=122) or any of the  
653 various 19 subunits of the 19S RP (n=10-52). Fluorescence intensity (a.u) was measured in the region  
654 outlined with the white dashed lines as indicated in (A). All images taken at the same laser intensity  
655 and PMT gain, and then the same post-image modifications made to each image. \*\*\*\* represents p-  
656 values < 0.0001 compared to *control(RNAi)* condition. Error bars represent SEM. Scale bar, 50 $\mu$ m.

657 **Figure 3: Defects in the mitotic germ line result from 19S RP subunit knockdown.**  
658 Representative images of the distal tip of the *C. elegans* germ line visualized with DAPI. (A) Wild  
659 type N2 controls. (B) *rpn-13(RNAi)* resulted in no cell cycle defects, presenting mitotic tips  
660 comparable to WT worms. Both wild type and *rpn-13(RNAi)* germ lines exhibited obvious transition  
661 zones (white dash line indicates start of transition zone) with characteristic crescent shape nuclei  
662 (blue arrow), (C, D) Worms treated with *rpn-2(RNAi)* or *rpn-3(RNAi)* presented an increased number  
663 of cells in M phase and the presence of small or fragmented nuclei (blue arrowheads). Both also had  
664 shorter mitotic tips with no clear transition zone. Images show max projections of Z stacks halfway  
665 through each gonad. Scale bar, 10  $\mu$ m.

666 **Figure 4: Synaptonemal complex defects are observed upon knockdown of 19S proteasome**  
667 **subunits.** Representative images of germ lines visualized with anti-SYP-1 to mark the synaptonemal  
668 complex (green), anti-XND-1 (purple), and DAPI to mark DNA (blue). (A) Control, empty vector,  
669 shows the expected formation of a few SC polycomplexes (PCs) in TZ. (B) Mild-phenotype:  
670 extended region of PCs reaching early pachytene, with an abundant number of nuclei with fully  
671 polymerized SC in mid-pachytene. Premature polarization is also observed. (C) Severe phenotype:  
672 extended region of PCs into mid-pachytene, with almost all nuclei having at least one PC and no  
673 polymerization of SYP-1. Premature polarization of SYP-1 was present at late pachytene. (D) No  
674 phenotype: full polymerization of SYP-1 throughout pachytene stage and correct timing of  
675 polarization to the short arm of the chromosome at diplotene comparable to control. Whole gonad  
676 scale bar, 50  $\mu$ m. Zoom in boxes correspond to: (1) Transition Zone, (2) Early-Mid Pachytene, (3)  
677 Late Pachytene, scale bar, 10  $\mu$ m

678 **Figure 5: XND-1 turnover is affected by knockdown of a subset of 19S RP non-ATPase**  
679 **subunits.** Representative images showing defects in XND-1 turnover after depletion of a specific  
680 group of non-ATPase proteasome subunits. Anti-XND-1 (magenta); DAPI stained DNA (cyan). (A)

681 Vector control. (B) *rpn-3(RNAi)* and (C) *rpn-6.1(RNAi)* are examples of two subunits whose  
682 knockdown causes persistence of high levels of nucleoplasmic XND-1 in late pachytene nuclei. (D)  
683 *dss-1(RNAi)* is representative of the class of subunits whose depletion does not affect XND-1.

684 **Figure 6. WEE-1.3 function and localization are altered by depletion of specific proteasome**  
685 **subunits.** (A) Average 24 hr brood and WEE-1.3 nuclear localization status of hermaphrodites  
686 treated with either *control(RNAi)*, *wee-1.3(RNAi)*, *cdk-1(RNAi)* individually (bolded) or co-depleted  
687 with WEE-1.3, or 19S RP subunits co-depleted with WEE-1.3 via RNAi. All co-depletion conditions  
688 were compared to WEE-1.3 co-depleted with the control RNAi condition. \* represents p values  
689 <0.001, Y (yes) or N (No) represents whether or not aberrant nuclear localization of WEE-1.3 occur  
690 when control or proteasome subunits depleted individually. (B) Live imaging of germ lines from  
691 strain WDC2 *wee-1.3(ana2[gfp::wee-1.3])* treated with either *control(RNAi)*, *rpn-6.1(RNAi)* or *dss-*  
692 *1(RNAi)*. All images were taken at the same laser intensity and PMT gain. Scale bar, 100µm.

693 **Figure 7. The two RPN-6.1 isoforms exhibit different spatial localization.** Live imaging of  
694 hermaphrodites expressing endogenously GFP-tagged (A) RPN-9 and (B) RPN-6. Strains are WDC5  
695 *rpn-9(ana5 [gfp::rpn-9])* and WDC3 *rpn-6.1a(ana3[gfp::rpn-6.1a])*. (C) Immunofluorescence image  
696 of *rpn-6.1(ana12[rpn-6.1::ollas])* strain dissected germ line co-stained with anti-OLLAS (red), anti-  
697 pH3 (green, condensed chromatin) and DAPI for DNA (blue). Bright nuclear and relatively dim  
698 cytoplasmic RPN-6.1b expression shown throughout germ line. Scale bar, 50µm.

699 **Figure 8. RPN-6.1 and RPN-7 are required for the nuclear localization of RPN-8 and RPN-9.**  
700 (A) Live imaging of hermaphrodite oocytes from endogenously GFP tagged strains *rpn-*  
701 *7(ana1[gfp::rpn7])*, *rpn-8(ana4[gfp::rpn-8])*, *rpn-9(ana5[gfp::rpn-9])* and *rpn-12(ana6[gfp::rpn-*  
702 *12])* treated with either *control(RNAi)*, *rpn-6.1(RNAi)* or *rpn-7(RNAi)* (n = 15 - 42). Scale bar  
703 represents 25µm. (B) Model for role of RPN-6.1 and RPN-7 in nuclear localization of 19S RP lid  
704 combining existing information on eukaryotic proteasome assembly model (Budenholzer *et al.*, 2017;  
705 Bai *et al.*, 2019).

## 706 Author Contributions

707 LMF and CQC designed experiments, performed experiments and wrote aspects of the manuscript.  
708 MM and CU performed experiments. AKA and JLY conceived the projects, designed experiments,  
709 and wrote aspects of the manuscript. All authors revised the manuscript.

## 710 Funding Information

711 This was supported in part by Department of Defense grant awards W911NF1810465 and 64684-RT-  
712 REP (AKA), by the Global Consortium for Reproductive Longevity and Equality at the Buck  
713 Institute, made possible by the Bia-Echo Foundation, award GCRLE-2220 (CQC), and by NIGMS  
714 grant 5R01GM125800 (JLY, CQC)

## 715 Conflict of Interest

716 The authors declare that the research was conducted in the absence of any commercial or financial  
717 relationships that could be construed as a potential conflict of interest.

## 718 Acknowledgements

719 We thank the undergraduate researchers in the Allen lab for their assistance with general laboratory  
720 tasks that enabled this research; the Duttaroy and Robinson Labs at Howard University for sharing  
721 equipment and reagents; Dr. Kuppuswamy Subramaniam for kindly providing the IT1187 strain; and  
722 members of the Baltimore Worm Club for helpful discussions. We also thank Dr. Valentin Boerner  
723 and his laboratory for helpful discussions and all members of the Yanowitz for input into the  
724 experiments.

## 725 References

- 726 Adams, J. *et al.* (1999) ‘Proteasome inhibitors: A novel class of potent and effective antitumor  
727 agents’, *Cancer Research*, 59(11).
- 728 Ahuja, J. S. *et al.* (2017) ‘Control of meiotic pairing and recombination by chromosomally tethered  
729 26S proteasome’, *Science*, 355(6323). doi: 10.1126/science.aaf4778.
- 730 Albert, S. *et al.* (2017) ‘Proteasomes tether to two distinct sites at the nuclear pore complex’,  
731 *Proceedings of the National Academy of Sciences of the United States of America*, 114(52). doi:  
732 10.1073/pnas.1716305114.
- 733 Allen, A. K., Nesmith, J. E. and Golden, A. (2014) ‘An RNAi-based suppressor screen identifies  
734 interactors of the Myt1 ortholog of *Caenorhabditis elegans*.’, *G3 (Bethesda, Md.)*. United States,  
735 4(12), pp. 2329–2343. doi: 10.1534/g3.114.013649.
- 736 Arribere, J. A. *et al.* (2014) ‘Efficient marker-free recovery of custom genetic modifications with  
737 CRISPR/Cas9 in *Caenorhabditis elegans*’, *Genetics*, 198(3), pp. 837–846. doi:  
738 10.1534/genetics.114.169730.
- 739 Bai, M. *et al.* (2019) ‘In-depth analysis of the lid subunits assembly mechanism in mammals’,  
740 *Biomolecules*. doi: 10.3390/biom9060213.
- 741 Bard, J. A. M. *et al.* (2018) ‘Structure and Function of the 26S Proteasome’, *Annual Review of*  
742 *Biochemistry*. doi: 10.1146/annurev-biochem-062917-011931.
- 743 Beck, F. *et al.* (2012) ‘Near-atomic resolution structural model of the yeast 26S proteasome.’,  
744 *Proceedings of the National Academy of Sciences of the United States of America*, 109(37), pp.  
745 14870–14875. doi: 10.1073/pnas.1213333109.
- 746 Belote, J. M. and Zhong, L. (2009) ‘Duplicated proteasome subunit genes in *Drosophila* and their  
747 roles in spermatogenesis’, *Heredity*, 103(1). doi: 10.1038/hdy.2009.23.
- 748 Bhat, K. P. and Greer, S. F. (2011) ‘Proteolytic and non-proteolytic roles of ubiquitin and the  
749 ubiquitin proteasome system in transcriptional regulation’, *Biochimica et Biophysica Acta - Gene*  
750 *Regulatory Mechanisms*, pp. 150–155. doi: 10.1016/j.bbagr.2010.11.006.
- 751 Boateng, R. *et al.* (2017) ‘Novel functions for the RNA-binding protein ETR-1 in *Caenorhabditis*  
752 *elegans* reproduction and engulfment of germline apoptotic cell corpses’, *Developmental Biology*.  
753 doi: 10.1016/j.ydbio.2017.06.015.
- 754 Brenner, S. (1974) ‘The genetics of *Caenorhabditis elegans*’, *Genetics*. 1974/05/01, 77(1), pp. 71–  
755 94. Available at:  
756 [http://www.ncbi.nlm.nih.gov/entrez/query.fcgi?cmd=Retrieve&db=PubMed&dopt=Citation&list\\_uid](http://www.ncbi.nlm.nih.gov/entrez/query.fcgi?cmd=Retrieve&db=PubMed&dopt=Citation&list_uids=4366476)  
757 [s=4366476](http://www.ncbi.nlm.nih.gov/entrez/query.fcgi?cmd=Retrieve&db=PubMed&dopt=Citation&list_uids=4366476).
- 758 Brooks, P. *et al.* (2000) ‘Subcellular localization of proteasomes and their regulatory complexes in  
759 mammalian cells.’, *The Biochemical journal*, 346 Pt 1, pp. 155–161. doi: 10.1042/0264-  
760 6021:3460155.
- 761 Budenholzer, L. *et al.* (2017) ‘Proteasome Structure and Assembly’, *Journal of Molecular Biology*,  
762 pp. 3500–3524. doi: 10.1016/j.jmb.2017.05.027.
- 763 Budenholzer, L. *et al.* (2020) ‘The Sts1 nuclear import adapter uses a non-canonical bipartite nuclear  
764 localization signal and is directly degraded by the proteasome’, *Journal of Cell Science*, 133(6), p.



- 765 jcs236158. doi: 10.1242/jcs.236158.
- 766 Burrows, A. E. *et al.* (2006) 'The *C. elegans* Myt1 ortholog is required for the proper timing of  
767 oocyte maturation', *Development*. 2006/01/20, 133(4), pp. 697–709. doi: dev.02241 [pii]  
768 10.1242/dev.02241.
- 769 Chang, C. *et al.* (2001) 'The Gal4 Activation Domain Binds Sug2 Protein, a Proteasome Component,  
770 in Vivo and in Vitro', *Journal of Biological Chemistry*, 276(33). doi: 10.1074/jbc.M102254200.
- 771 Chen, J. J. and Arur, S. (2017) 'Discovering Functional ERK Substrates Regulating *Caenorhabditis*  
772 *elegans* Germline Development', *Methods in molecular biology (Clifton, N.J.)*, 1487, pp. 317–335.  
773 doi: 10.1007/978-1-4939-6424-6\_24.
- 774 Colaiácovo, M. P. *et al.* (2003) 'Synaptonemal complex assembly in *C. elegans* is dispensable for  
775 loading strand-exchange proteins but critical for proper completion of recombination',  
776 *Developmental Cell*, 5(3). doi: 10.1016/S1534-5807(03)00232-6.
- 777 Couteau, F. and Zetka, M. (2005) 'HTP-1 coordinates synaptonemal complex assembly with  
778 homolog alignment during meiosis in *C. elegans*', *Genes and Development*, 19(22). doi:  
779 10.1101/gad.1348205.
- 780 Crittenden, S. L. *et al.* (2006) 'Cellular analyses of the mitotic region in the *Caenorhabditis elegans*  
781 adult germ line.', *Molecular biology of the cell*, 17(7), pp. 3051–61. doi: 10.1091/mbc.E06-03-0170.
- 782 Dantuma, N. P. *et al.* (2000) 'Short-lived green fluorescent proteins for quantifying  
783 ubiquitin/proteasome-dependent proteolysis in living cells.', *Nature biotechnology*. United States,  
784 18(5), pp. 538–543. doi: 10.1038/75406.
- 785 Enenkel, C. (2014) 'Nuclear transport of yeast proteasomes', *Biomolecules*. MDPI, 4(4), pp. 940–  
786 955. doi: 10.3390/biom4040940.
- 787 Ferdous, A., Kodadek, T. and Johnston, S. A. (2002) 'A nonproteolytic function of the 19S  
788 regulatory subunit of the 26S proteasome is required for efficient activated transcription by human  
789 RNA polymerase II.', *Biochemistry*, 41(42), pp. 12798–805. doi: 10.1021/bi020425t.
- 790 Fernando, L. M., Elliot, J. and Allen, A. K. (2020) 'The *Caenorhabditis elegans* proteasome subunit  
791 RPN -12 is required for hermaphrodite germline sex determination and oocyte quality. ',  
792 *Developmental Dynamics*. doi: 10.1002/dvdy.235.
- 793 Finley, D. (2009) 'Recognition and Processing of Ubiquitin-Protein Conjugates by the Proteasome',  
794 *Annu Rev Biochem*, 78, pp. 477–513. doi: 10.1146/annurev.biochem.78.081507.101607.Recognition.
- 795 Funakoshi, M. *et al.* (2009) 'Multiple assembly chaperones govern biogenesis of the proteasome  
796 regulatory particle base', *Cell*. 2009/05/14, 137(5), pp. 887–899. doi: 10.1016/j.cell.2009.04.061.
- 797 Geng, F., Wenzel, S. and Tansey, W. P. (2012) 'Ubiquitin and proteasomes in transcription', *Annual*  
798 *Review of Biochemistry*, 81. doi: 10.1146/annurev-biochem-052110-120012.
- 799 Glotzer, M., Murray, A. W. and Kirschner, M. W. (1991) 'Cyclin is degraded by the ubiquitin  
800 pathway.', *Nature*, 349(6305), pp. 132–8. doi: 10.1038/349132a0.
- 801 Goldstein, P. (1986) 'The synaptonemal complexes of *Caenorhabditis elegans*: the dominant him  
802 mutant mnT6 and pachytene karyotype analysis of the X-autosome translocation', *Chromosoma*,  
803 93(3). doi: 10.1007/BF00292746.



- 804 Gómez-H, L. *et al.* (2019) ‘The PSMA8 subunit of the spermatoproteasome is essential for proper  
805 meiotic exit and mouse fertility.’, *PLoS genetics*, 15(8), p. e1008316. doi:  
806 10.1371/journal.pgen.1008316.
- 807 Gonzalez, F. *et al.* (2002) ‘Recruitment of a 19S proteasome subcomplex to an activated promoter.’,  
808 *Science (New York, N.Y.)*, 296(5567), pp. 548–50. doi: 10.1126/science.1069490.
- 809 Greenstein, D. (2005) ‘Control of oocyte meiotic maturation and fertilization.’, *WormBook : the*  
810 *online review of C. elegans biology*, pp. 1–12. doi: 10.1895/wormbook.1.53.1.
- 811 Groll, M. *et al.* (1997) ‘Structure of 20S proteasome from yeast at 2.4Å resolution’, *Nature*,  
812 386(6624), pp. 463–471. doi: 10.1038/386463a0.
- 813 Hamazaki, J., Hirayama, S. and Murata, S. (2015) ‘Redundant Roles of Rpn10 and Rpn13 in  
814 Recognition of Ubiquitinated Proteins and Cellular Homeostasis’, *PLoS Genetics*, 11(7). doi:  
815 10.1371/journal.pgen.1005401.
- 816 Hamer, G., Matilainen, O. and Holmberg, C. I. (2010) ‘A photoconvertible reporter of the ubiquitin-  
817 proteasome system in vivo’, *Nature methods*, 7(6), pp. 473–8. doi: 10.1038/nmeth.1460.
- 818 Hanna, J. and Finley, D. (2007) ‘A proteasome for all occasions’, *FEBS Letters*, pp. 2854–2861. doi:  
819 10.1016/j.febslet.2007.03.053.
- 820 Hillers, K. J. *et al.* (2015) ‘Meiosis.’, *WormBook : the online review of C. elegans biology*, pp. 1–54.  
821 doi: 10.1895/wormbook.1.178.1.
- 822 Hirano, Y. *et al.* (2006) ‘Cooperation of Multiple Chaperones Required for the Assembly  
823 of Mammalian 20S Proteasomes’, *Molecular Cell*, 24(6). doi: 10.1016/j.molcel.2006.11.015.
- 824 Hirano, Y. *et al.* (2008) ‘Dissecting beta-ring assembly pathway of the mammalian 20S proteasome’,  
825 *The EMBO journal*. 2008/07/24. Nature Publishing Group, 27(16), pp. 2204–2213. doi:  
826 10.1038/emboj.2008.148.
- 827 Hochstrasser, M. (1996) ‘Ubiquitin-dependent protein degradation’, *Annual review of genetics*,  
828 30(1), pp. 405–439. doi: 10.1146/annurev.genet.30.1.405.
- 829 Huang, X. *et al.* (2016) ‘An atomic structure of the human 26S proteasome’, *Nature Structural &*  
830 *Molecular Biology*, 23(9), pp. 778–785. doi: 10.1038/nsmb.3273.
- 831 Hubbard, E. J. A. (2007) ‘*Caenorhabditis elegans* germ line: a model for stem cell biology.’,  
832 *Developmental dynamics*, 236(12), pp. 3343–57. doi: 10.1002/dvdy.21335.
- 833 Hubbard, E. J. and Greenstein, D. (2000) ‘The *Caenorhabditis elegans* gonad: a test tube for cell and  
834 developmental biology’, *Dev Dyn*, 218(1), pp. 2–22. Available at:  
835 [http://www.ncbi.nlm.nih.gov/entrez/query.fcgi?cmd=Retrieve&db=PubMed&dopt=Citation&list\\_uids=10822256](http://www.ncbi.nlm.nih.gov/entrez/query.fcgi?cmd=Retrieve&db=PubMed&dopt=Citation&list_uids=10822256).  
836
- 837 Inoue, T. *et al.* (2006) ‘Cell cycle control by daf-21/Hsp90 at the first meiotic prophase/metaphase  
838 boundary during oogenesis in *Caenorhabditis elegans*’, *Dev Growth Differ*. 2006/02/10, 48(1), pp.  
839 25–32. doi: 10.1111/j.1440-169X.2006.00841.x.
- 840 Isono, E. *et al.* (2005) ‘Functional analysis of Rpn6p, a lid component of the 26 S proteasome, using  
841 temperature-sensitive rpn6 mutants of the yeast *Saccharomyces cerevisiae*’, *Journal of Biological*  
842 *Chemistry*, 280(8). doi: 10.1074/jbc.M409364200.

- 843 Isono, E. *et al.* (2007) ‘The assembly pathway of the 19S regulatory particle of the yeast 26S  
844 proteasome’, *Molecular biology of the cell*. 2006/11/29. The American Society for Cell Biology,  
845 18(2), pp. 569–580. doi: 10.1091/mbc.e06-07-0635.
- 846 Kaneko, T. *et al.* (2009) ‘Assembly pathway of the Mammalian proteasome base subcomplex is  
847 mediated by multiple specific chaperones.’, *Cell*. United States, 137(5), pp. 914–925. doi:  
848 10.1016/j.cell.2009.05.008.
- 849 Kim, H. M., Yu, Y. and Cheng, Y. (2011) ‘Structure characterization of the 26S proteasome.’,  
850 *Biochimica et biophysica acta*, 1809(2), pp. 67–79. doi: 10.1016/j.bbagr.2010.08.008.
- 851 Kish-Trier, E. and Hill, C. P. (2013) ‘Structural Biology of the Proteasome’, *Annual Review of*  
852 *Biophysics*, 42, pp. 29–49. doi: 10.1146/annurev-biophys-083012-130417.
- 853 Kocsisova, Z., Kornfeld, K. and Schedl, T. (2019) ‘Rapid population-wide declines in stem cell  
854 number and activity during reproductive aging in *C. elegans*’, *Development (Cambridge)*, 146(8).  
855 doi: 10.1242/dev.173195.
- 856 Kumar, G. A. and Subramaniam, K. (2018) ‘PUF-8 facilitates homologous chromosome pairing by  
857 promoting proteasome activity during meiotic entry in *C. elegans*’, *Development (Cambridge)*.  
858 England, 145(7). doi: 10.1242/dev.163949.
- 859 Kusmierczyk, A. R. *et al.* (2008) ‘A multimeric assembly factor controls the formation of alternative  
860 20S proteasomes’, *Nature Structural and Molecular Biology*, 15(3). doi: 10.1038/nsmb.1389.
- 861 Kwak, J., Workman, J. L. and Lee, D. (2011) ‘The proteasome and its regulatory roles in gene  
862 expression’, *Biochimica et Biophysica Acta - Gene Regulatory Mechanisms*, pp. 88–96. doi:  
863 10.1016/j.bbagr.2010.08.001.
- 864 Lamitina, S. T. and L’Hernault, S. W. (2002) ‘Dominant mutations in the *Caenorhabditis elegans*  
865 Myt1 ortholog *wee-1.3* reveal a novel domain that controls M-phase entry during spermatogenesis’,  
866 *Development*, 129(21), pp. 5009–5018. Available at:  
867 [http://www.ncbi.nlm.nih.gov/entrez/query.fcgi?cmd=Retrieve&db=PubMed&dopt=Citation&list\\_uids=12397109](http://www.ncbi.nlm.nih.gov/entrez/query.fcgi?cmd=Retrieve&db=PubMed&dopt=Citation&list_uids=12397109).  
868
- 869 Lee, D. *et al.* (2005) ‘The proteasome regulatory particle alters the SAGA coactivator to enhance its  
870 interactions with transcriptional activators’, *Cell*, 123(3). doi: 10.1016/j.cell.2005.08.015.
- 871 Lee, M. H. and Schedl, T. (2010) ‘*C. elegans* STAR proteins, GLD-1 and ASD-2, regulate specific  
872 RNA targets to control development’, *Advances in Experimental Medicine and Biology*, 693, pp.  
873 106–122. doi: 10.1007/978-1-4419-7005-3\_8.
- 874 Lehmann, A. *et al.* (2002) ‘20 S proteasomes are imported as precursor complexes into the nucleus of  
875 yeast.’ Edited by R. Huber’, *Journal of Molecular Biology*, 317(3), pp. 401–413. doi:  
876 <https://doi.org/10.1006/jmbi.2002.5443>.
- 877 Li, X. *et al.* (2007) ‘beta-Subunit appendages promote 20S proteasome assembly by overcoming an  
878 Ump1-dependent checkpoint’, *The EMBO journal*. 2007/04/12. Nature Publishing Group, 26(9), pp.  
879 2339–2349. doi: 10.1038/sj.emboj.7601681.
- 880 Li, X. *et al.* (2013) ‘Electron counting and beam-induced motion correction enable near-atomic-  
881 resolution single-particle cryo-EM’, *Nature Methods*, 10(6), pp. 584–590. doi: 10.1038/nmeth.2472.
- 882 Li, Y., Li, S. and Wu, H. (2022) ‘Ubiquitination-Proteasome System (UPS) and Autophagy Two  
883 Main Protein Degradation Machineries in Response to Cell Stress’, *Cells*, 11(5). doi:

- 884 10.3390/cells11050851.
- 885 Liu, H. *et al.* (2012) ‘Enhancement of 26S proteasome functionality connects oxidative stress and  
886 vascular endothelial inflammatory response in diabetes mellitus’, *Arteriosclerosis, Thrombosis, and*  
887 *Vascular Biology*. doi: 10.1161/ATVBAHA.112.253385.
- 888 Lokireddy, S., Kukushkin, N. V. and Goldberg, A. L. (2015) ‘cAMP-induced phosphorylation of 26S  
889 proteasomes on Rpn6/PSMD11 enhances their activity and the degradation of misfolded proteins.’,  
890 *Proceedings of the National Academy of Sciences of the United States of America*, 112(52), pp.  
891 E7176-85. doi: 10.1073/pnas.1522332112.
- 892 MacQueen, A. J. *et al.* (2002) ‘Synapsis-dependent and -independent mechanisms stabilize homolog  
893 pairing during meiotic prophase in *C. elegans*’, *Genes and Development*, 16(18). doi:  
894 10.1101/gad.1011602.
- 895 Mainpal, R., Nance, J. and Yanowitz, J. L. (2015) ‘A germ cell determinant reveals parallel pathways  
896 for germ line development in *Caenorhabditis elegans*’, *Development (Cambridge)*, 142(20). doi:  
897 10.1242/dev.125732.
- 898 Maneix, L. and Catic, A. (2016) ‘Touch and go: Nuclear proteolysis in the regulation of metabolic  
899 genes and cancer’, *FEBS Letters*, pp. 908–923. doi: 10.1002/1873-3468.12087.
- 900 Marshall, R. S. and Vierstra, R. D. (2019) ‘Dynamic regulation of the 26S proteasome: From  
901 synthesis to degradation’, *Frontiers in Molecular Biosciences*. doi: 10.3389/fmolb.2019.00040.
- 902 Martinez-Perez, E. and Villeneuve, A. M. (2005) ‘HTP-1-dependent constraints coordinate homolog  
903 pairing and synapsis and promote chiasma formation during *C. elegans* meiosis’, *Genes and*  
904 *Development*, 19(22). doi: 10.1101/gad.1338505.
- 905 Mikkonen, E., Haglund, C. and Holmberg, C. I. (2017) ‘Immunohistochemical analysis reveals  
906 variations in proteasome tissue expression in *C. elegans*’, *PLoS ONE*, 12(8). doi:  
907 10.1371/journal.pone.0183403.
- 908 Motosugi, R. and Murata, S. (2019) ‘Dynamic regulation of proteasome expression’, *Frontiers in*  
909 *Molecular Biosciences*, 6(MAY), pp. 4–11. doi: 10.3389/fmolb.2019.00030.
- 910 Murata, S., Yashiroda, H. and Tanaka, K. (2009) ‘Molecular mechanisms of proteasome assembly’,  
911 *Nature Reviews Molecular Cell Biology*. doi: 10.1038/nrm2630.
- 912 Myeku, N. *et al.* (2011) ‘Assessment of proteasome impairment and accumulation/aggregation of  
913 ubiquitinated proteins in neuronal cultures’, *Methods in Molecular Biology*. doi: 10.1007/978-1-  
914 61779-328-8\_18.
- 915 Nishiyama, A. *et al.* (2000) ‘A nonproteolytic function of the proteasome is required for the  
916 dissociation of Cdc2 and cyclin B at the end of M phase’, *Genes and Development*, 14(18), pp.  
917 2344–2357. doi: 10.1101/gad.823200.
- 918 Olaitan, A. O. and Aballay, A. (2018) ‘Non-proteolytic activity of 19S proteasome subunit RPT-6  
919 regulates GATA transcription during response to infection’, *PLoS Genetics*, 14(9). doi:  
920 10.1371/journal.pgen.1007693.
- 921 Pack, C. G. *et al.* (2014) ‘Quantitative live-cell imaging reveals spatio-temporal dynamics and  
922 cytoplasmic assembly of the 26S proteasome’, *Nature Communications*, 5. doi:  
923 10.1038/ncomms4396.

- 924 Paix, A. *et al.* (2015) ‘High Efficiency, Homology-Directed Genome Editing in *Caenorhabditis*  
925 *elegans* Using CRISPR/Cas9 Ribonucleoprotein Complexes.’, *Genetics*. doi:  
926 10.1534/genetics.115.179382.
- 927 Palacios, V. *et al.* (2021) ‘Importin-9 regulates chromosome segregation and packaging in  
928 *Drosophila* germ cells’, *Journal of Cell Science*, 134(7). doi: 10.1242/jcs.258391.
- 929 Paraskevopoulos, K. *et al.* (2014) ‘Dss1 is a 26S proteasome ubiquitin receptor’, *Molecular cell*.  
930 2014/10/09. Cell Press, 56(3), pp. 453–461. doi: 10.1016/j.molcel.2014.09.008.
- 931 Pispá, J. *et al.* (2008) ‘*C. elegans* *dss-1* is functionally conserved and required for oogenesis and  
932 larval growth’, *BMC Dev Biol*, 8, p. 51. doi: 1471-213X-8-51 [pii]r10.1186/1471-213X-8-51.
- 933 Pispá, J., Matilainen, O. and Holmberg, C. I. (2020) ‘Tissue-specific effects of temperature on  
934 proteasome function’, *Cell stress & chaperones*. 2020/04/18. Springer Netherlands, 25(3), pp. 563–  
935 572. doi: 10.1007/s12192-020-01107-y.
- 936 Prasada Rao, H. B. D. *et al.* (2017) ‘A SUMO-ubiquitin relay recruits proteasomes to chromosome  
937 axes to regulate meiotic recombination’, *Science*, 355(6323). doi: 10.1126/science.aaf6407.
- 938 Roelofs, J. *et al.* (2009) ‘Chaperone-mediated pathway of proteasome regulatory particle assembly’,  
939 *Nature*, 459(7248), pp. 861–865. doi: 10.1038/nature08063.
- 940 Rog, O., Köhler, S. and Dernburg, A. F. (2017) ‘The synaptonemal complex has liquid crystalline  
941 properties and spatially regulates meiotic recombination factors’, *eLife*, 6. doi: 10.7554/eLife.21455.
- 942 Ruiz, E. J., Vilar, M. and Nebreda, A. R. (2010) ‘A two-step inactivation mechanism of Myt1  
943 ensures CDK1/cyclin B activation and meiosis I entry.’, *Current Biology*. 2010/04/07, 20(8), pp.  
944 717–23. doi: 10.1016/j.cub.2010.02.050.
- 945 Saez, I. and Vilchez, D. (2014) ‘The mechanistic links between proteasome activity, aging and age-  
946 related diseases.’, *Current genomics*, 15(1), pp. 38–51. doi: 10.2174/138920291501140306113344.
- 947 Santamaría, P. G. *et al.* (2003) ‘Rpn6p, a proteasome subunit from *Saccharomyces cerevisiae*, is  
948 essential for the assembly and activity of the 26 S proteasome’, *Journal of Biological Chemistry*,  
949 278(9). doi: 10.1074/jbc.M209420200.
- 950 Satoh, K. *et al.* (2001) ‘Assembly of the 26S proteasome is regulated by phosphorylation of the  
951 p45/Rpt6 ATPase subunit’, *Biochemistry*, 40(2), pp. 314–319. doi: 10.1021/bi001815n.
- 952 Schmidt, M. and Finley, D. (2014) ‘Regulation of proteasome activity in health and disease.’,  
953 *Biochimica biophysica acta*, 1843(1), pp. 13–25. doi: 10.1016/j.bbamcr.2013.08.012.
- 954 Seo, H. D. *et al.* (2017) ‘The 19S proteasome is directly involved in the regulation of  
955 heterochromatin spreading in fission yeast’, *Journal of Biological Chemistry*, 292(41), pp. 17144–  
956 17155. doi: 10.1074/jbc.M117.790824.
- 957 Shimada, M. *et al.* (2006) ‘Proteasomal ubiquitin receptor RPN-10 controls sex determination in  
958 *Caenorhabditis elegans*’, *Molecular Biology of the Cell*, 17(12), pp. 5356–5371. doi:  
959 10.1091/mbc.E06-05-0437.
- 960 Silva, N. *et al.* (2014) ‘The fidelity of synaptonemal complex assembly is regulated by a signaling  
961 mechanism that controls early meiotic progression’, *Developmental Cell*, 31(4). doi:  
962 10.1016/j.devcel.2014.10.001.



- 963 Sutovsky, P. (2011) ‘Sperm proteasome and fertilization’, *Reproduction*. doi: 10.1530/REP-11-0041.
- 964 Takahashi, M. *et al.* (2002) ‘Reverse genetic analysis of the *Caenorhabditis elegans* 26S proteasome  
965 subunits by RNA interference’, *Biological Chemistry*, 383(7–8), pp. 1263–1266. doi:  
966 10.1515/BC.2002.140.
- 967 Le Tallec, B. *et al.* (2007) ‘20S proteasome assembly is orchestrated by two distinct pairs of  
968 chaperones in yeast and in mammals.’, *Molecular cell*. United States, 27(4), pp. 660–674. doi:  
969 10.1016/j.molcel.2007.06.025.
- 970 Tanaka, K. *et al.* (1990) ‘Possible mechanism of nuclear translocation of proteasomes’, *FEBS*  
971 *Letters*. John Wiley & Sons, Ltd, 271(1–2), pp. 41–46. doi: [https://doi.org/10.1016/0014-](https://doi.org/10.1016/0014-5793(90)80367-R)  
972 [5793\(90\)80367-R](https://doi.org/10.1016/0014-5793(90)80367-R).
- 973 Thibaudeau, T. A. and Smith, D. M. (2019) ‘A practical review of proteasome pharmacology’,  
974 *Pharmacological Reviews*, 71(2). doi: 10.1124/pr.117.015370.
- 975 Timmons, L., Court, D. L. and Fire, a (2001) ‘Ingestion of bacterially expressed dsRNAs can  
976 produce specific and potent genetic interference in *Caenorhabditis elegans*.’, *Gene*, 263(1–2), pp.  
977 103–12. Available at: <http://www.ncbi.nlm.nih.gov/pubmed/11223248>.
- 978 Tomko, R. J. and Hochstrasser, M. (2011) ‘Incorporation of the Rpn12 Subunit Couples Completion  
979 of Proteasome Regulatory Particle Lid Assembly to Lid-Base Joining’, *Molecular Cell*. doi:  
980 10.1016/j.molcel.2011.11.020.
- 981 Uechi, H., Hamazaki, J. and Murata, S. (2014) ‘Characterization of the testis-specific proteasome  
982 subunit  $\alpha$ 4s in mammals’, *The Journal of biological chemistry*. 2014/03/25. American Society for  
983 Biochemistry and Molecular Biology, 289(18), pp. 12365–12374. doi: 10.1074/jbc.M114.558866.
- 984 Unno, M. *et al.* (2002) ‘The Structure of the Mammalian 20S Proteasome at 2.75 Å Resolution’,  
985 *Structure*, 10(5), pp. 609–618. doi: [https://doi.org/10.1016/S0969-2126\(02\)00748-7](https://doi.org/10.1016/S0969-2126(02)00748-7).
- 986 Uprety, B. *et al.* (2012) ‘The 19S proteasome subcomplex promotes the targeting of NuA4 HAT to  
987 the promoters of ribosomal protein genes to facilitate the recruitment of TFIID for transcriptional  
988 initiation in vivo’, *Nucleic Acids Research*. doi: 10.1093/nar/gkr977.
- 989 Vilchez, D., Boyer, L., *et al.* (2012) ‘Increased proteasome activity in human embryonic stem cells is  
990 regulated by PSMD11’, *Nature*. doi: 10.1038/nature11468.
- 991 Vilchez, D., Morante, I., *et al.* (2012) ‘RPN-6 determines *C. elegans* longevity under proteotoxic  
992 stress conditions.’, *Nature*. Nature Publishing Group, 489(7415), pp. 263–8. doi:  
993 10.1038/nature11315.
- 994 Wagner, C. R. *et al.* (2010) ‘Xnd-1 regulates the global recombination landscape in *Caenorhabditis*  
995 *elegans*’, *Nature*, 467(7317). doi: 10.1038/nature09429.
- 996 Walerych, D. *et al.* (2016) ‘Proteasome machinery is instrumental in a common gain-of-function  
997 program of the p53 missense mutants in cancer’, *Nature Cell Biology*, 18, pp. 897–909. doi:  
998 10.1038/ncb3380.
- 999 Wendler, P. *et al.* (2004) ‘The bipartite nuclear localization sequence of Rpn2 is required for nuclear  
1000 import of proteasomal base complexes via karyopherin  $\alpha$  and proteasome functions.’, *The*  
1001 *Journal of biological chemistry*. United States, 279(36), pp. 37751–37762. doi:  
1002 10.1074/jbc.M403551200.

- 1003 Wendler, P. and Enenkel, C. (2019) ‘Nuclear transport of yeast proteasomes’, *Frontiers in Molecular*  
1004 *Biosciences*, 6(MAY), pp. 1–4. doi: 10.3389/fmolb.2019.00034.
- 1005 Wormbase. (2022) <http://www.wormbase.org/db/get?name=WBGene00004462;class=gene>
- 1006 Wu, W. *et al.* (2018) ‘PAC1-PAC2 proteasome assembly chaperone retains the core  $\alpha$ 4– $\alpha$ 7 assembly  
1007 intermediates in the cytoplasm’, *Genes to Cells*, 23(10). doi: 10.1111/gtc.12631.
- 1008 Yashiroda, H. *et al.* (2008) ‘Crystal structure of a chaperone complex that contributes to the assembly  
1009 of yeast 20S proteasomes.’, *Nature structural & molecular biology*. United States, 15(3), pp. 228–  
1010 236. doi: 10.1038/nsmb.1386.
- 1011 Zhang, Q. *et al.* (2019) ‘Meiosis I progression in spermatogenesis requires a type of testis-specific  
1012 20S core proteasome’, *Nature Communications*, 10(1). doi: 10.1038/s41467-019-11346-y.
- 1013 Zou, T. and Lin, Z. (2021) ‘The involvement of ubiquitination machinery in cell cycle regulation and  
1014 cancer progression’, *International Journal of Molecular Sciences*. doi: 10.3390/ijms22115754.



# Figure 1

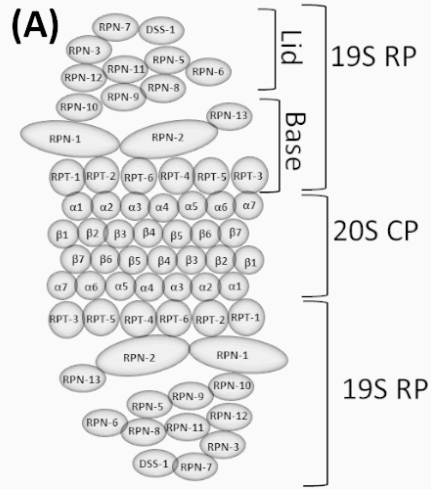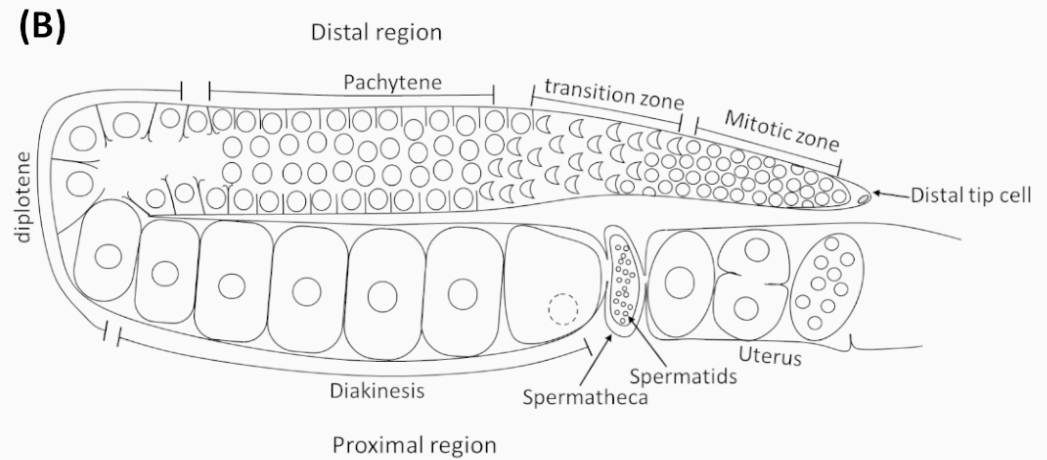

**(C)**

| RNAi Condition            | Average 24hr brood | RNAi Condition | Average 24hr brood |
|---------------------------|--------------------|----------------|--------------------|
| <i>control</i>            | 157.8 ± 1.7        | <i>rpt-2</i>   | 4.8 ± 0.8          |
| <i>dss-1</i>              | 126.7 ± 5.4        | <i>rpn-2</i>   | 4.6 ± 1.1          |
| <i>rpn-13<sup>§</sup></i> | 99.6 ± 4.7         | <i>rpn-7</i>   | 4.1 ± 0.4          |
| <i>rpn-9*</i>             | 77.6 ± 3.2         | <i>rpn-6.1</i> | 3.8 ± 0.5          |
| <i>rpn-10</i>             | 66.1 ± 5.5         | <i>rpt-5</i>   | 3.5 ± 0.4          |
| <i>rpn-5</i>              | 53.9 ± 3.6         | <i>rpt-3</i>   | 3.1 ± 0.4          |
| <i>rpn-12</i>             | 47.4 ± 7.6         | <i>rpn-8</i>   | 1.6 ± 0.4          |
| <i>rpt-6</i>              | 40.1 ± 3.8         | <i>rpn-1</i>   | 0.3 ± 0.2          |
| <i>rpn-11</i>             | 9.9 ± 1.2          | <i>rpt-4</i>   | 0.3 ± 0.1          |
| <i>rpt-1</i>              | 5.1 ± 0.9          | <i>pbs-4</i>   | 0.3 ± 0.1          |
| <i>rpn-3</i>              | 5.0 ± 0.9          |                |                    |

§Ruptured through vulva phenotype observed in F1 progeny.

\*Protruded vulva observed in F1 larvae.

**(D)**

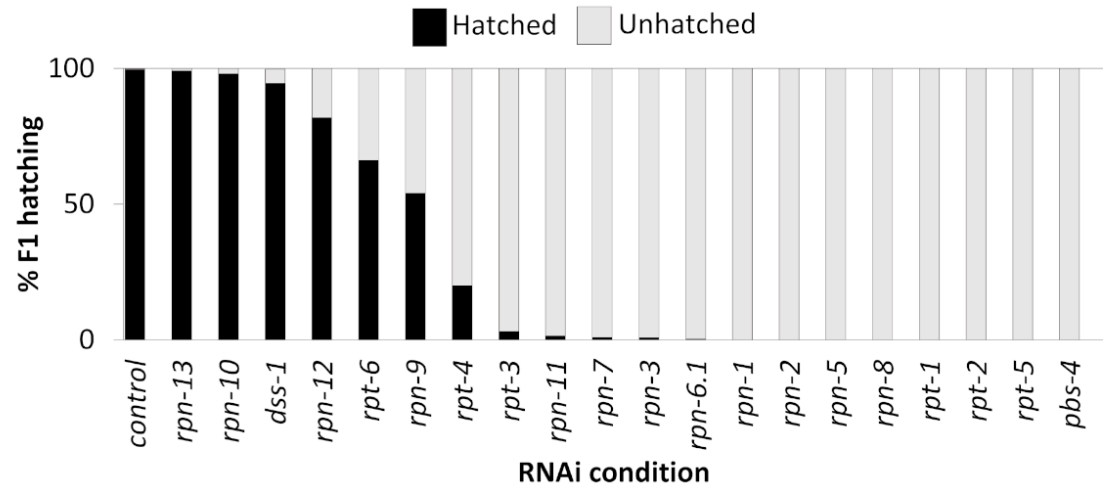

# Figure 2

(A)

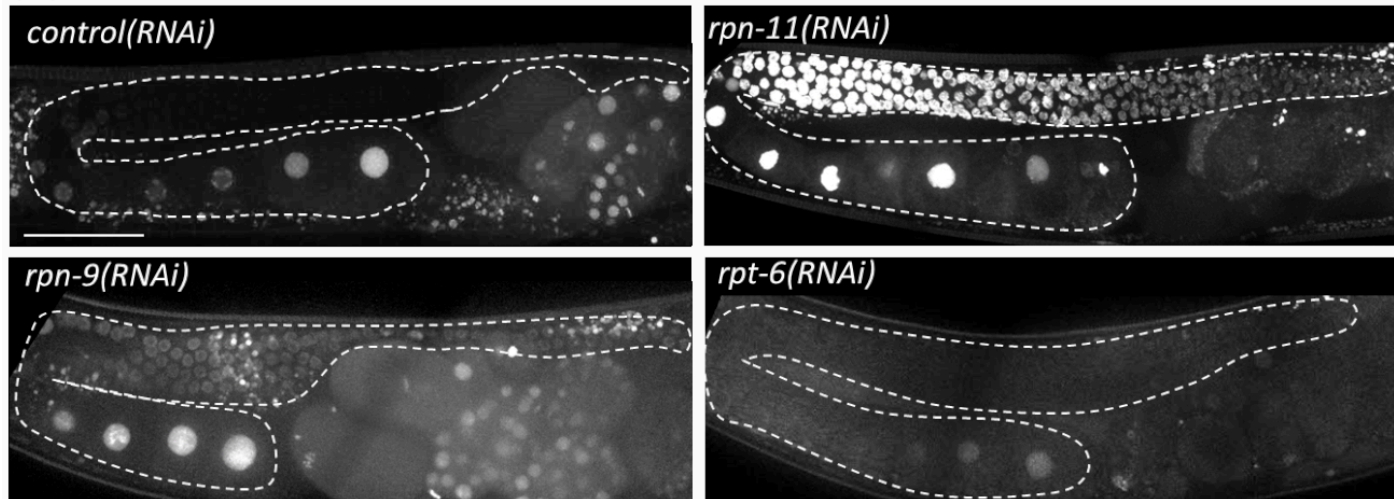

(B)

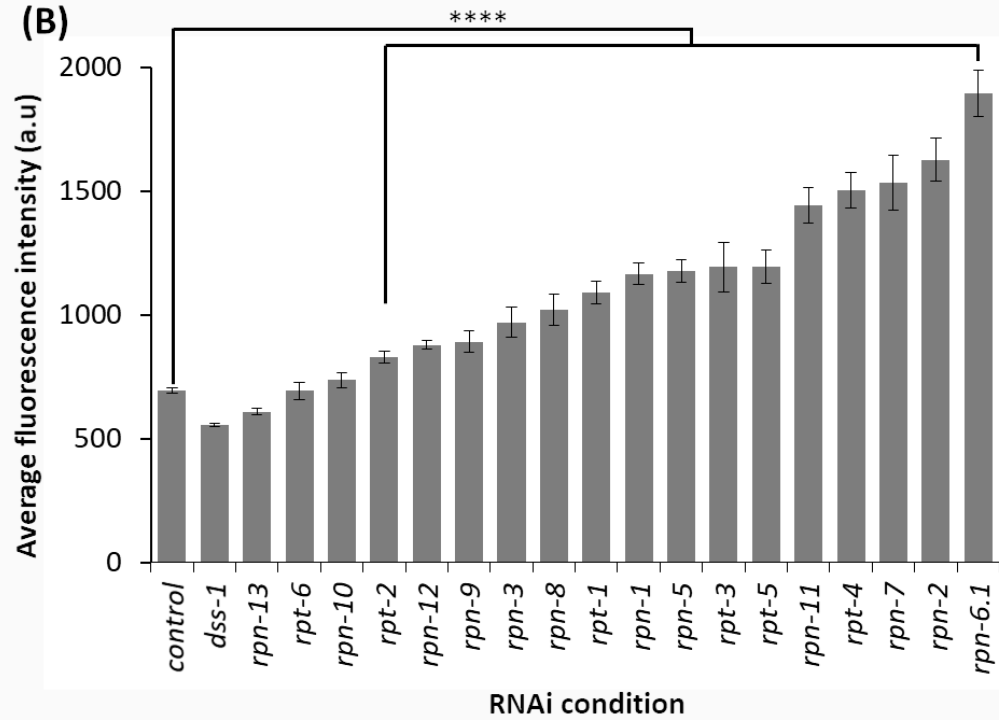

# Figure 3

Figure 3

A)

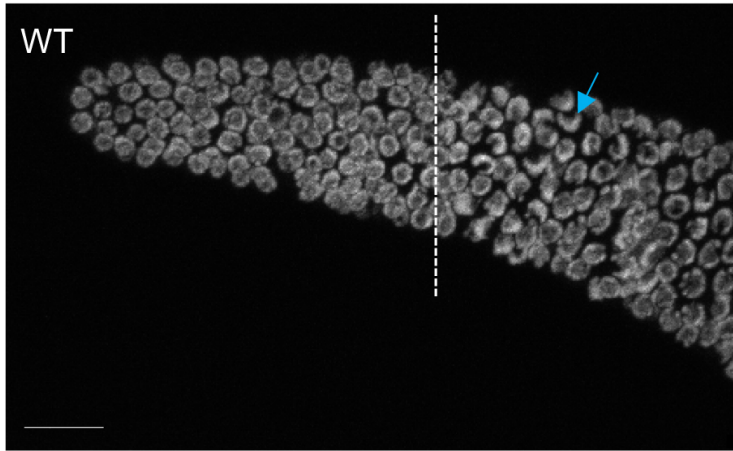

B)

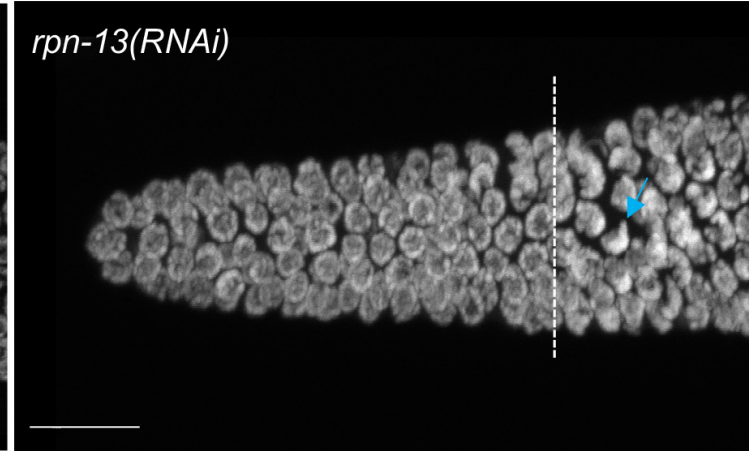

*rpn-2(RNAi)*

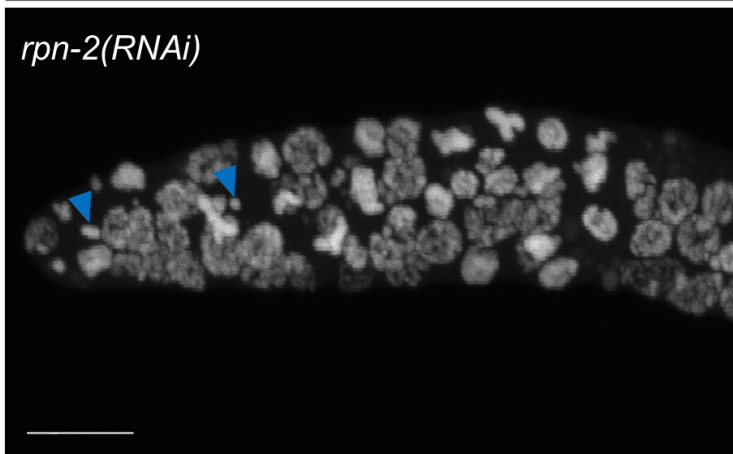

*rpn-3(RNAi)*

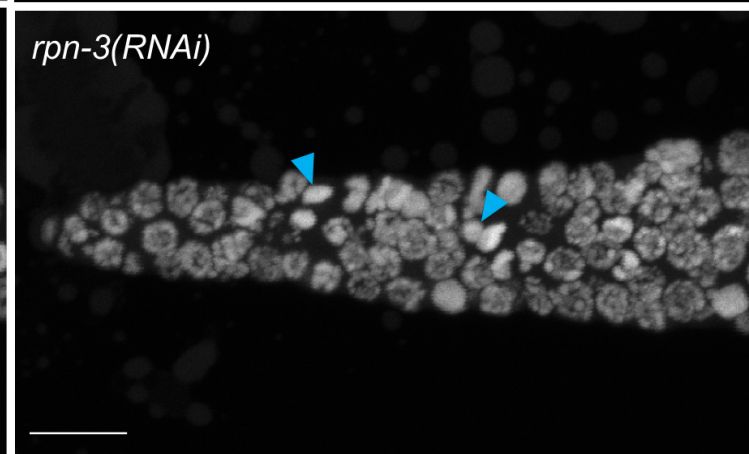

C)

D)

# Figure 4

A) Control

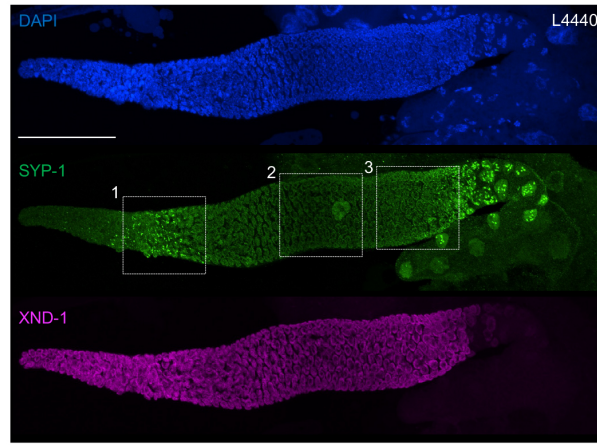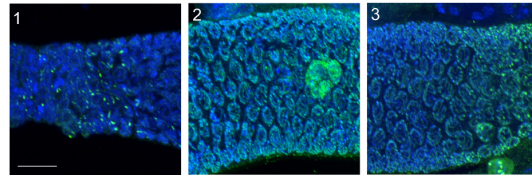

C) Mild Phenotype

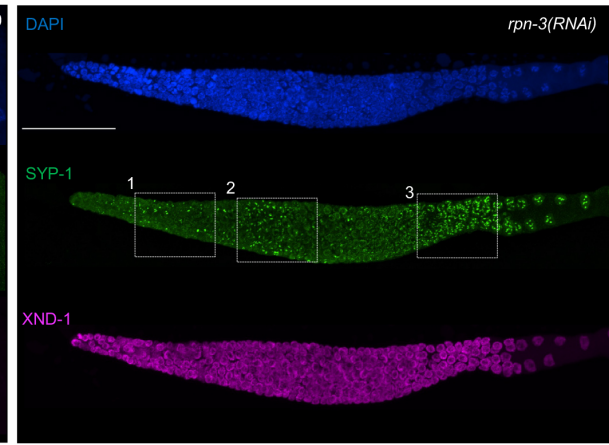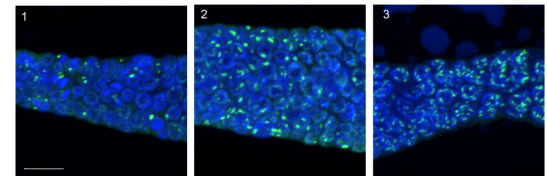

B) No-Phenotype

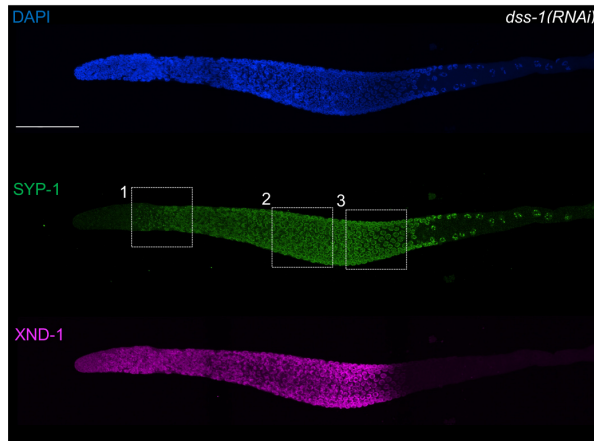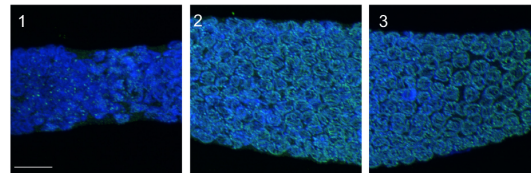

D) Severe Phenotype

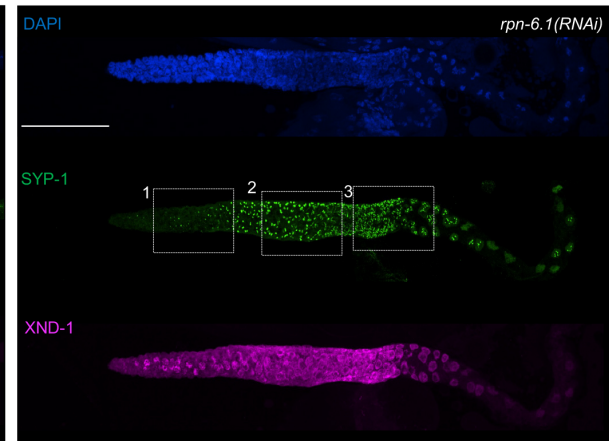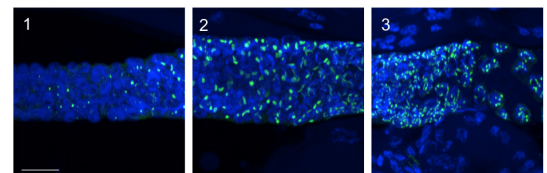



# Figure 5

A) Control L4440

B) *rpn-3(RNAi)*

C) *rpn-6.1(RNAi)*

D) *dss-1(RNAi)*

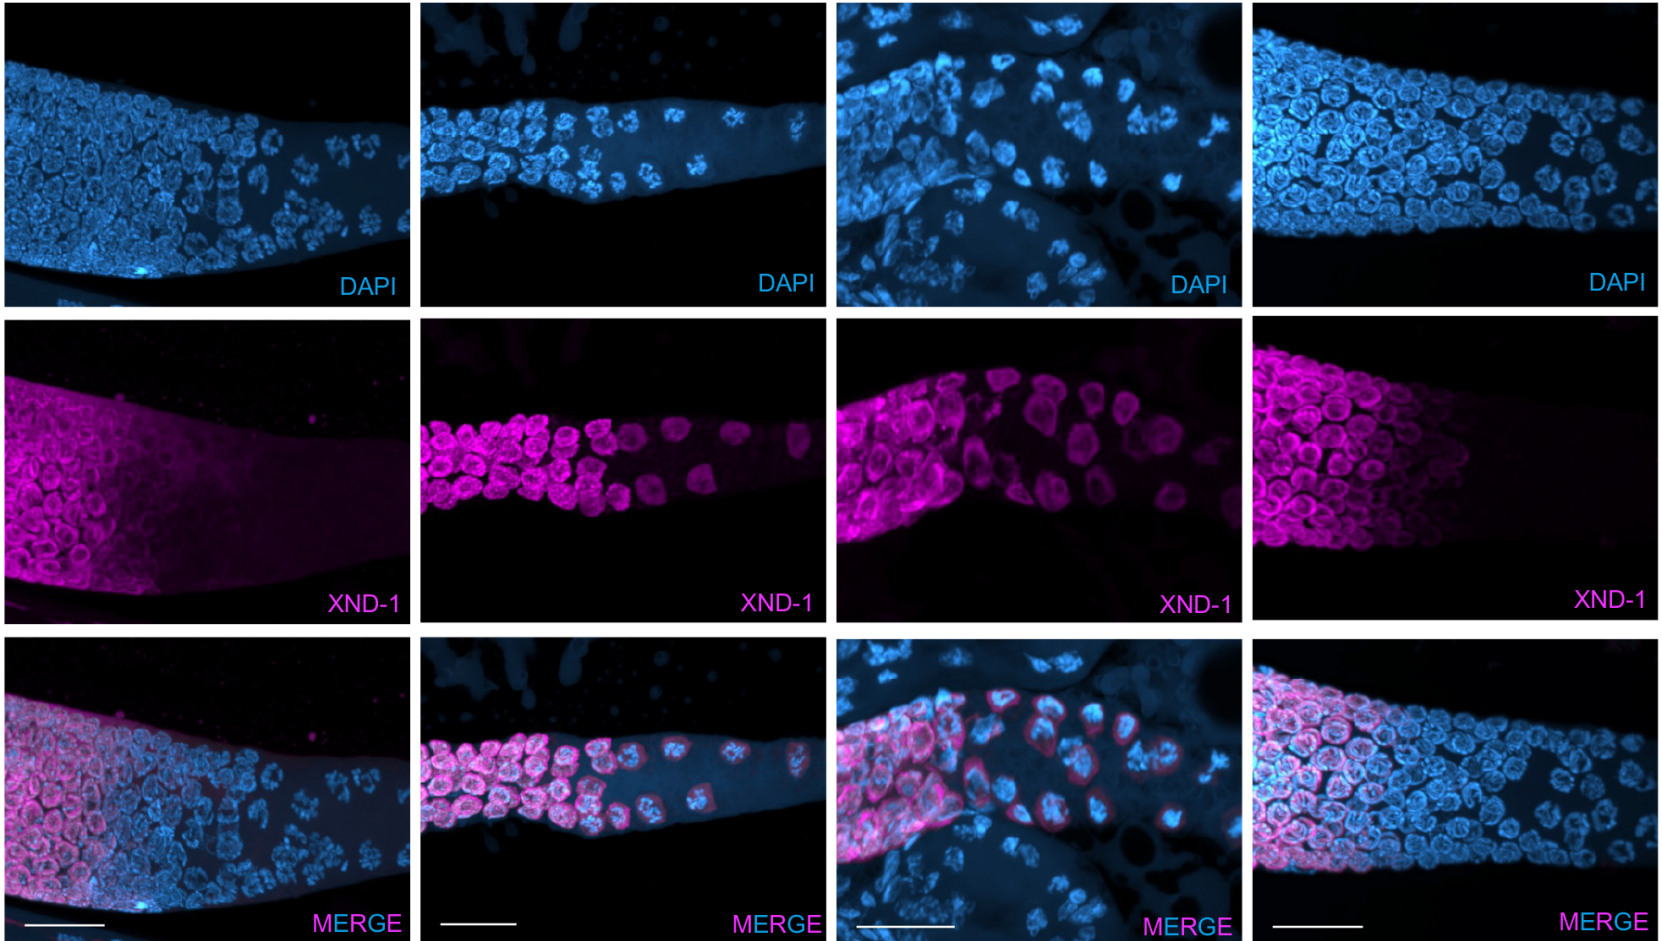



# Figure 6

(A)

| RNAi Condition  | Average 24hr brood | WEE-1.3 nuclear localization <sup>¶</sup> (Y/N) | RNAi Condition | Average 24hr brood | WEE-1.3 nuclear localization <sup>¶</sup> (Y/N) |
|-----------------|--------------------|-------------------------------------------------|----------------|--------------------|-------------------------------------------------|
| <i>control</i>  | 147.7 ± 2.7        | N                                               | <i>rpn-10</i>  | 0.2 ± 0.1          | Y                                               |
| <i>wee-1.3</i>  | 0.3 ± 0.1          | N                                               | <i>rpn-11*</i> | 4.1 ± 1.2          | Y                                               |
| <i>cdk-1</i>    | 97.2 ± 3.2         | N                                               | <i>rpn-12</i>  | 0.1 ± 0.1          | Y                                               |
| <i>control</i>  | 0.5 ± 0.1          | ND                                              | <i>rpn-13</i>  | 0.00 ± 0.00        | N                                               |
| <i>cdk-1*</i>   | 101.2 ± 3.8        | ND                                              | <i>rpt-1</i>   | 0.5 ± 0.2          | Y                                               |
| <i>rpn-1</i>    | 0.1 ± 0.1          | Y                                               | <i>rpt-2*</i>  | 2.7 ± 0.7          | Y                                               |
| <i>rpn-2*</i>   | 9.8 ± 1.3          | Y                                               | <i>rpt-3</i>   | 0.4 ± 0.2          | Y                                               |
| <i>rpn-3*</i>   | 7.8 ± 1.7          | Y                                               | <i>rpt-4</i>   | 0.8 ± 0.2          | Y                                               |
| <i>rpn-5*</i>   | 9.9 ± 2.0          | Y                                               | <i>rpt-5</i>   | 1.0 ± 0.7          | Y                                               |
| <i>rpn-6.1*</i> | 10.0 ± 1.1         | Y                                               | <i>rpt-6</i>   | 0.00 ± 0.00        | N                                               |
| <i>rpn-7*</i>   | 23.9 ± 2.6         | Y                                               | <i>dss-1</i>   | 1.1 ± 0.4          | N                                               |
| <i>rpn-8*</i>   | 23.3 ± 3.8         | Y                                               | <i>pbs-4</i>   | 0.9 ± 0.3          | Y                                               |
| <i>rpn-9*</i>   | 10.0 ± 2.1         | Y                                               |                |                    |                                                 |

All co-depletions with WEE-1.3 are bolded

§ Genes knocked down individually

¶ Depletion of proteasome subunit individually via RNAi that caused aberrant nuclear localization (Y) or did not cause aberrant nuclear localization of WEE-1.3 (N)

\*p values < 0.001 compared to WEE-1.3 co-depleted with Control via RNAi

(B)

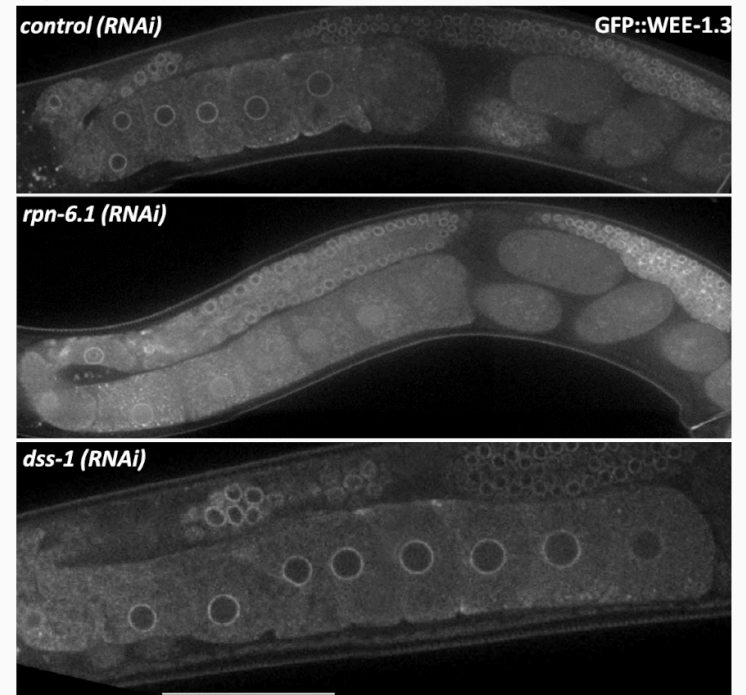

# Figure 7

(A)

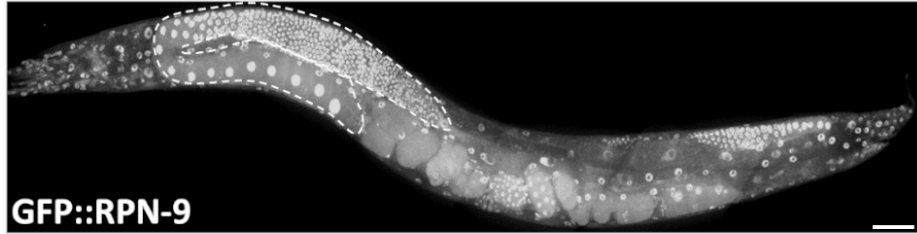

(B)

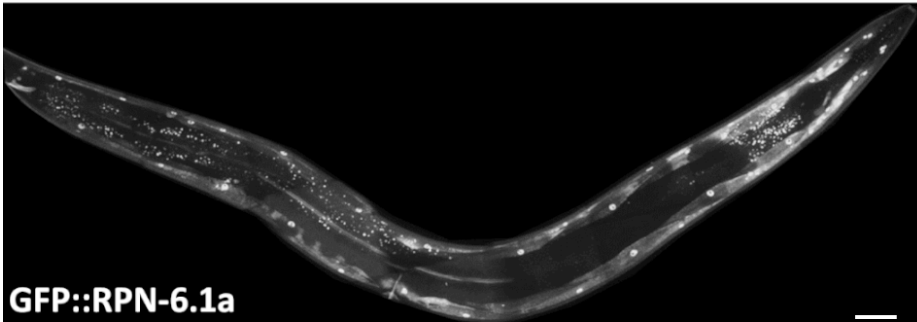

(C)

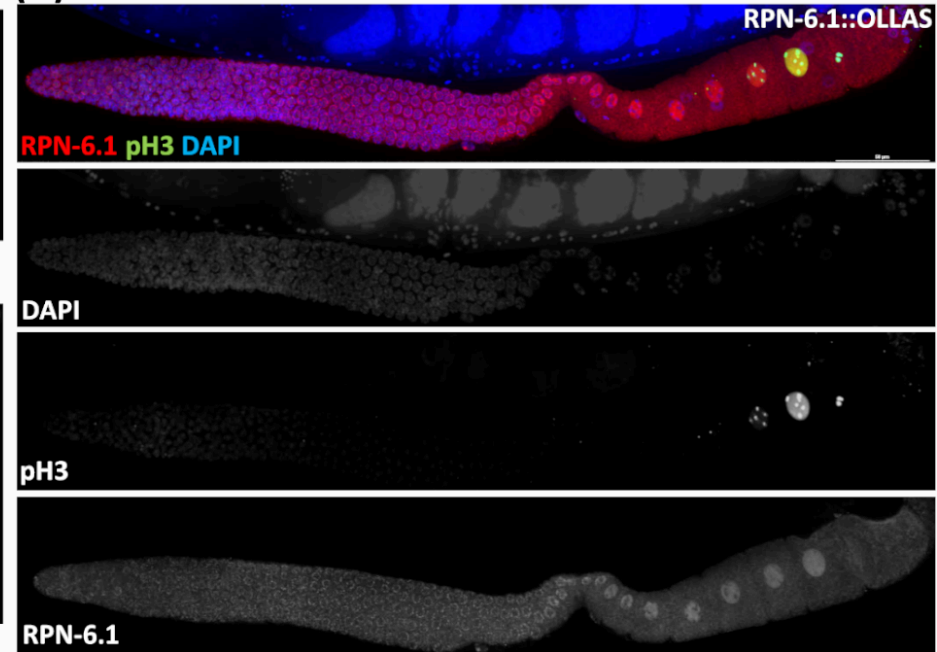

# Figure 8

(A)

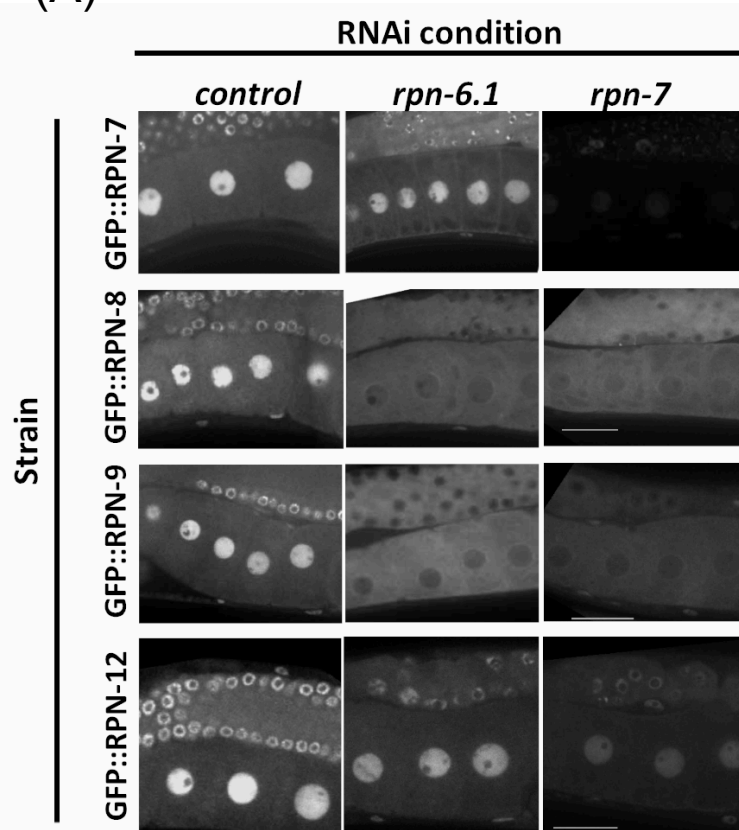

(B)

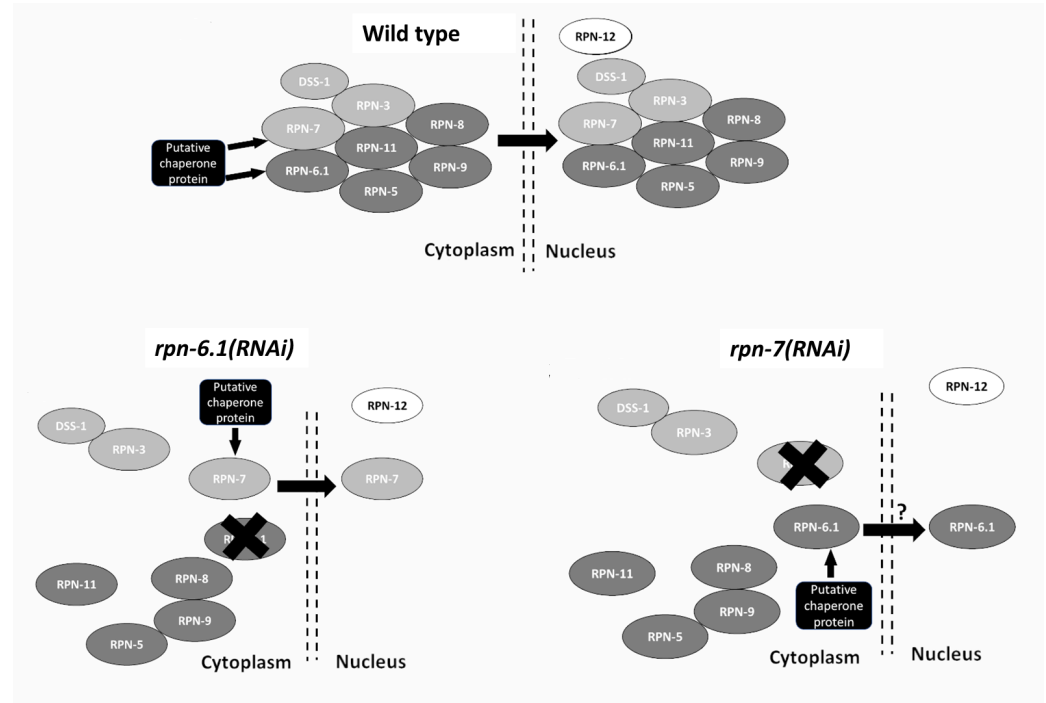

# Table 1

| Gene RNAi               | Normal mitotic tip | Abnormal mitotic tip |                            |
|-------------------------|--------------------|----------------------|----------------------------|
|                         |                    | ↑ M phase nuclei     | Small or fragmented nuclei |
| <i>rpn-1</i> (10)       |                    | 80%                  | 100%                       |
| <i>rpn-2</i> (10)       | 10%                | 90%                  | 70%                        |
| <i>rpn-3</i> (7)        |                    | 100%                 | 100%                       |
| <i>rpn-5</i> (9)        |                    | 78%                  | 100%                       |
| <i>rpn-6.1</i> (11)     | 9%                 | 91%                  | 82%                        |
| <i>rpn-7</i> (10)       |                    | 90%                  | 100%                       |
| <i>rpn-8</i> (10)       |                    | 100%                 | 90%                        |
| <i>rpn-9</i> (9)        | 44%                | 56%                  | 56%                        |
| <i>rpn-10</i> (6)       | 100%               |                      |                            |
| <i>rpn-11</i> (8)       |                    | 88%                  | 100%                       |
| <i>rpn-12</i> (10)      | 100%               |                      |                            |
| <i>rpn-13</i> (11)      | 100%               |                      |                            |
| <i>rpn-15/Dss-1</i> (9) | 100%               |                      |                            |
| <i>N2 WT</i> (10)       | 100%               |                      |                            |

# Table 2

| Gene RNAi         | Emb Lethal # | Effect on Brood <sup>a</sup> | Effect on Proteolytic Activity <sup>&amp;</sup> | MZ defects <sup>§</sup> | PCs + Premature Polarization <sup>^</sup> | Defective XND-1 turnover <sup>@</sup> | Aberrant nuclear WEE-1.3 <sup>¶</sup> | Suppress <i>wee-1.3(RNAi)</i> infertility <sup>§</sup> |
|-------------------|--------------|------------------------------|-------------------------------------------------|-------------------------|-------------------------------------------|---------------------------------------|---------------------------------------|--------------------------------------------------------|
| <i>rpn-1</i>      | 1            | 1                            | +                                               | +                       | +                                         | +                                     | +                                     | no                                                     |
| <i>rpn-2</i>      | 1            | 1                            | +                                               | +                       | +                                         | +                                     | +                                     | +                                                      |
| <i>rpn-3</i>      | 1            | 1                            | +                                               | +                       | +                                         | +                                     | +                                     | +                                                      |
| <i>rpn-5</i>      | 1            | 2                            | +                                               | +                       | +                                         | +                                     | +                                     | +                                                      |
| <i>rpn-6.1</i>    | 1            | 1                            | +                                               | +                       | +                                         | +                                     | +                                     | +                                                      |
| <i>rpn-7</i>      | 1            | 1                            | +                                               | +                       | +                                         | +                                     | +                                     | +                                                      |
| <i>rpn-8</i>      | 1            | 1                            | +                                               | +                       | +                                         | +                                     | +                                     | +                                                      |
| <i>rpn-9</i>      | 3            | 3                            | +                                               | +                       | no                                        | no                                    | +                                     | +                                                      |
| <i>rpn-10</i>     | 5            | 2                            | no                                              | none                    | no                                        | no                                    | no                                    | no                                                     |
| <i>rpn-11</i>     | 1            | 1                            | +                                               | +                       | +                                         | +                                     | +                                     | +                                                      |
| <i>rpn-12</i>     | 4            | 2                            | +                                               | none                    | no                                        | no                                    | +                                     | no                                                     |
| <i>rpn-13</i>     | 5            | 3                            | no                                              | none                    | no                                        | no                                    | no                                    | no                                                     |
| <i>dss-1</i>      | 4            | 3                            | no                                              | none                    | no                                        | no                                    | no                                    | no                                                     |
| <i>rpt-1</i>      | 1            | 1                            | +                                               | n.d.                    | n.d.                                      | n.d.                                  | +                                     | no                                                     |
| <i>rpt-2</i>      | 1            | 1                            | +                                               | n.d.                    | n.d.                                      | n.d.                                  | +                                     | +                                                      |
| <i>rpt-3</i>      | 1            | 1                            | +                                               | n.d.                    | n.d.                                      | n.d.                                  | +                                     | no                                                     |
| <i>rpt-4</i>      | 2            | 1                            | +                                               | n.d.                    | n.d.                                      | n.d.                                  | +                                     | no                                                     |
| <i>rpt-5</i>      | 1            | 1                            | +                                               | n.d.                    | n.d.                                      | n.d.                                  | +                                     | no                                                     |
| <i>rpt-6</i>      | 3            | 2                            | no                                              | n.d.                    | n.d.                                      | n.d.                                  | no                                    | no                                                     |
| <b>Control</b>    | 5            | 4                            | no                                              | none                    | no                                        | no                                    | no                                    | no                                                     |
| <b>Bortezomib</b> | 1            | 1                            | +                                               | n.d.                    | n.d.                                      | n.d.                                  | no                                    | no                                                     |

# 1 <5% hatching; 2= 5-39%; 3 = 40-74%; 4 = 75-97%; 5 = no defect.

<sup>a</sup>Average 24 hour brood: 1 < 10 progeny; 2 = 11-75; 3 = 76-150; 4 >150.

<sup>&</sup> No does not result in statistically significant difference in expression of germ line proteolytic reporter. + results in a statistically significant increase in expression of the germ line proteolytic report.

<sup>§</sup> (+) Cell cycle defects in the adult germ line after knocking down RP subunits by RNAi. (-) No cell cycle defects in the adult germ line after knocking down RP subunits by RNAi.

<sup>^</sup> (+) SC polycomplexes and premature polarization of *syp-1* after knocking down RP subunits by RNAi. (-) No SC polycomplexes and premature polarization of *syp-1* after knocking down RP subunits by RNAi.

<sup>@</sup> (+) Defective XND-1 turnover in late pachytene after knocking down RP subunits by RNAi. (-) Normal XND-1 turnover in late
